# Supplementary material for: Piperacillin/tazobactam resistance in a clinical isolate of Escherichia coli due to IS26-mediated amplification of blaTEM-1B
Source: PubMed Central journal article supplement (PMC7530762; doi:10.1038/s41467-020-18668-2), 2020-10-01
Supplement: 41467_2020_18668_MOESM1_ESM.pdf [file 41467_2020_18668_MOESM1_ESM.pdf]

**Piperacillin/tazobactam resistance in a clinical isolate of *Escherichia coli* due to IS26-mediated amplification of *bla*<sub>TEM-1B</sub>.**

Hubbard *et al.*

## **Supplementary Methods 1:**

### *DNA extraction*

Genomic DNA for qPCR was extracted using the PureGene® Yeast/Bact kit B (Qiagen, Germany) following the manufacturer's instructions for extraction of DNA from Gram-negative bacteria after normalising each culture to an optical density at 600nm (OD<sub>600</sub>) of 1 and eluted in molecular grade water.

Long fragment genomic DNA extraction for PCR amplification and both Illumina and Oxford Nanopore Technologies (ONT) sequencing was performed using the Genomic DNA Buffer Set, following the manufacturer's instructions for genomic DNA extraction using the Genomic-tip 100/G (both Qiagen, Germany) but eluted in molecular grade water.

Plasmid extraction was performed from 100 ml LB broth (LB) cultures with the Plasmid Midi Kit using Genomic-Tip 100 (both Qiagen, Germany) following the manufacturer's instructions and eluted in molecular grade water.

Total DNA concentration was measured using a QuBit 4.0 Fluorometer (Invitrogen, US), with the dsDNA Broad Range kit.

### *PCR*

A single replicate of all PCR reactions was performed using 0.02 U/μl Q5® High-Fidelity DNA Polymerase, 1x Q5® Reaction Buffer, 200 μM dNTPs and 0.5 μM of each primer (Supplementary Table 4) in a total volume of 50 μl.

16S rRNA PCR amplification was performed using the following protocol: denaturation at 98°C for 30 seconds, followed by 45 cycles of denaturation at 98°C for 10 seconds, annealing at 53°C for 30 seconds and elongation at 72°C for 30 seconds, followed by a single, final extension of 2 minutes at 72°C.

The detection of the pseudo-compound transposon or translocatable unit (TU) was performed using the following PCR protocol: denaturation at 98°C for 30 seconds, followed by 35 cycles of denaturation at 98°C for 10 seconds, annealing at 68°C (left junction of the pseudo-compound transposon in the chromosome and the tandem array of TUs) or 67°C (right junction of the pseudo-compound transposon in the chromosome) for 30 seconds and elongation at 72°C for 17 seconds (left junction of the pseudo-compound transposon in the chromosome), 25 seconds (right junction of the pseudo-compound transposon in the chromosome) or 20 seconds (tandem array of TUs), followed by a single, final extension of 2 minutes at 72°C.

Detection of the formation of junctions in the pHSG396:IS26 due to the insertion of the TU using the following PCR protocol: denaturation at 98°C for 30 seconds, followed by 35 cycles of denaturation at 98°C for 10 seconds, annealing at 68°C (left junction of the insertion) or 67°C (right junction of the insertion) for 30 seconds and elongation at 72°C for 15 seconds (left junction) and 14 seconds (right junction), followed by a single, final extension of 2 minutes at 72°C.

The PCR products from the left side of the pseudo-compound transposon in the chromosome and the TU were PCR purified using the Monarch® PCR and DNA Clean-up Kit (New England Biolabs (NEB), USA) following the manufacturer's protocol and eluted in molecular grade water. The PCR products from the right side of the pseudo-compound transposon in the chromosome and the left and right junction of the TU insertion into pHSG396:IS26 were extracted from the gel using the Monarch® DNA Gel Extraction Kit (NEB, USA) following the manufacturer's instructions and eluted in molecular grade water. All purified DNA extracts were then Sanger sequenced by GeneWiz (Takley, UK).

#### *IS26 plasmid construct*

IS26 from 190963 (TZP-susceptible isolate) was amplified using 0.02 U/μl Q5® High-Fidelity DNA Polymerase, 1x Q5® Reaction Buffer, 200 μM dNTPs and 0.5 μM of the primers CMCap\_F and CMCap\_R (Supplementary Table 4) in a total volume of 50 μl. Amplification was performed using the

following protocol; Denaturation at 98°C for 30 seconds, followed by 35 cycles of denaturation at 98°C for 10 seconds, annealing at 69°C for 30 seconds and elongation at 72°C for 9 seconds, followed by a single, final extension step 72°C for 2 minutes.

The restriction sites for the restriction enzymes EcoRI and KpnI were added to the 5' ends of the 820 bp double stranded amplicon by a second round of PCR, using the primers CMCapRE\_F and CMCapRE\_R (Supplementary Table 4). Amplification was performed using the same protocol as the initial amplification of IS26, except with an annealing temperature of 72°C for 30 seconds.

The resulting PCR product and the recipient plasmid pHSG396 were digested with the restriction enzymes EcoRI and KpnI (both NEB, US). PCR clean-up was then performed using the Monarch PCR and DNA Clean-up Kit following the manufacturer's instructions. The digested IS26 PCR product and pHSG396 were ligated together using T4 ligase (NEB, US), at a 3:1 insert to vector mass ratio, incubated at room temperature for 10 minutes.

The ligated plasmid (5 µl) was transformed into NEB® 5-alpha competent *E. coli* (NEB, US) using the following protocol; the reaction was incubated on ice for 2 minutes, then heat shocked at 42°C for 30 seconds. Following a second incubation on ice for 2 minutes, 950 µL of SOC outgrowth medium was added and incubated at 37°C, 250 rpm for 1 hour. The transformed cells were plated out onto LB agar supplement with 35 µg/ml chloramphenicol and Isopropyl β-D-1-thiogalactopyranoside/X-gal (Fisher Scientific, USA) and incubated at 37°C for 18 hours and the plasmid was extracted following the protocol above. IS26 in pHSG396 was Sanger sequenced by GeneWiz (Takely, UK) using commercially available M13 primers.

**Supplementary Table 1: Resistance profile of paired isolates determined in clinic.** Resistance profile of cefpodoxime (CPD), ceftaxime (FOX), piperacillin/tazobactam (TZP), meropenem (MEM), ciprofloxacin (CIP), cefotetan (CTT), amikacin (AMK), ertapenem (ETP), amoxicillin/clavulanic acid (AMC), chloramphenicol (CHL) and ampicillin (AMP) towards identified paired isolates with presumptive clonality assessed in clinic by disk diffusion method. Disk diffusion antimicrobial susceptibility testing was performed as a single replicate ( $n=1$ ).

| Patient | Isolate Number | CPD | FOX | TZP | MEM | CIP | CTT | AMK | ETP | AMC | CHL | AMP |
|---------|----------------|-----|-----|-----|-----|-----|-----|-----|-----|-----|-----|-----|
| 1       | 101737         | S   | S   | S   | S   | S   | S   | S   | S   | S   | -   | -   |
|         | 102167         | S   | S   | R   | S   | R   | S   | S   | S   | I   | -   | -   |
| 2       | 153964         | S   | S   | S   | S   | S   | S   | S   | S   | R   | S   | R   |
|         | 152025         | S   | S   | R   | S   | S   | S   | S   | S   | R   | S   | R   |
| 3       | 190693         | S   | S   | S   | S   | R   | R   | S   | S   | R   | S   | R   |
|         | 169757         | S   | S   | R   | S   | R   | R   | S   | S   | R   | S   | R   |

**Supplementary Table 2: TEM-1B is likely to be the most important determinant of**

**piperacillin/tazobactam resistance.** Minimum inhibitory concentrations (MIC) of piperacillin supplemented with 4 µg/ml tazobactam, 8 µg/ml tazobactam, 16 µg/ml tazobactam and 4 µg/ml tazobactam plus 100 mM sodium chloride. Each MIC were performed in triplicate (*n*=3).

|               | Piperacillin plus 4<br>µg/ml tazobactam | Piperacillin plus 8<br>µg/ml tazobactam | Piperacillin plus 16<br>µg/ml tazobactam | Piperacillin plus 4<br>µg/ml tazobactam<br>and 100 mM NaCl |
|---------------|-----------------------------------------|-----------------------------------------|------------------------------------------|------------------------------------------------------------|
| TZP-resistant | 128 µg/ml                               | 64 µg/ml                                | 16 µg/ml                                 | 64 µg/ml                                                   |

**Supplementary Table 3: Mean and standard error of the mean of all data presented in this study.**

| Assay and figure | Isolate         | Gene                  | Media | Mean  | Standard Error of the mean ( $\pm$ ) |
|------------------|-----------------|-----------------------|-------|-------|--------------------------------------|
| Nitrocefin assay |                 |                       |       |       |                                      |
| Fig. 1A          | TZP-susceptible | -                     | -     | 0.041 | 0.002                                |
| Fig. 1A          | TZP-resistant   | -                     | -     | 0.208 | 0.011                                |
| qPCR             |                 |                       |       |       |                                      |
| Fig. 1B          | TZP-susceptible | aac(3)-IIa            | -     | 1.089 | 0.037                                |
|                  |                 | aac(6')-Ib-cr         | -     | 1.226 | 0.068                                |
|                  |                 | bla <sub>OXA-1</sub>  | -     | 1.516 | 0.02                                 |
|                  |                 | bla <sub>TEM-1B</sub> | -     | 1.207 | 0.047                                |
|                  |                 | tet(D)                | -     | 0.525 | 0.016                                |
| Fig. 1B          | TZP-resistant   | aac(3)-IIa            | -     | 8.523 | 0.105                                |
|                  |                 | aac(6')-Ib-cr         | -     | 8.2   | 0.139                                |
|                  |                 | bla <sub>OXA-1</sub>  | -     | 7.252 | 0.375                                |
|                  |                 | bla <sub>TEM-1B</sub> | -     | 9.484 | 0.354                                |
|                  |                 | tet(D)                | -     | 9.154 | 0.286                                |

|        |                                 |                       |   |        |       |
|--------|---------------------------------|-----------------------|---|--------|-------|
| Fig. 3 | TZP-susceptible -<br>no TZP     | aac(3)-IIa            | - | 0.734  | 0.062 |
|        |                                 | aac(6')-Ib-cr         | - | 0.875  | 0.005 |
|        |                                 | bla <sub>OXA-1</sub>  | - | 1.199  | 0.041 |
|        |                                 | bla <sub>TEM-1B</sub> | - | 1.002  | 0.063 |
|        |                                 | tet(D)                | - | 1.292  | 0.104 |
| Fig. 3 | TZP-susceptible -<br>TZP        | aac(3)-IIa            | - | 3.104  | 0.339 |
|        |                                 | aac(6')-Ib-cr         | - | 3.249  | 0.377 |
|        |                                 | bla <sub>OXA-1</sub>  | - | 3.708  | 0.685 |
|        |                                 | bla <sub>TEM-1B</sub> | - | 3.604  | 0.811 |
|        |                                 | tet(D)                | - | 5.641  | 0.785 |
| Fig. 3 | TZP-susceptible +<br>IS26 - TZP | aac(3)-IIa            | - | 6.37   | 0.468 |
|        |                                 | aac(6')-Ib-cr         | - | 7.379  | 0.355 |
|        |                                 | bla <sub>OXA-1</sub>  | - | 8.571  | 0.369 |
|        |                                 | bla <sub>TEM-1B</sub> | - | 10.068 | 0.896 |
|        |                                 | tet(D)                | - | 10.919 | 1.153 |



|                     |                                      |                       |     |        |       |
|---------------------|--------------------------------------|-----------------------|-----|--------|-------|
| Fig. 3              | TZP-susceptible +<br>IS26 - CHL only | aac(3)-IIa            | -   | -0.627 | 0.297 |
|                     |                                      | aac(6')-Ib-cr         | -   | 1.128  | 0.186 |
|                     |                                      | bla <sub>OXA-1</sub>  | -   | 0.8    | 0.283 |
|                     |                                      | bla <sub>TEM-1B</sub> | -   | 1.257  | 0.105 |
|                     |                                      | tet(D)                | -   | 0.087  | 1.284 |
| Comparative fitness |                                      |                       |     |        |       |
| Fig. 4              | TZP-susceptible<br>TZP evolved       | -                     | ISO | 0.891  | 0.051 |
|                     |                                      | -                     | LB  | 1.105  | 0.062 |
|                     |                                      | -                     | M9  | 1.068  | 0.033 |
| Fig. 4              | TZP-resistant                        | -                     | ISO | 0.894  | 0.055 |
|                     |                                      | -                     | LB  | 1.051  | 0.031 |
|                     |                                      | -                     | M9  | 0.933  | 0.14  |

**Supplementary Table 4: Primer name and sequences used for PCR amplification and qPCR in this study.**

| Primer name | Primer Sequence                   |
|-------------|-----------------------------------|
| 16S-27F     | AGAGTTTGATCCTGGCTCAG              |
| 16S-1492R   | TACCTTGTTACGACTT                  |
| RM2_F1      | TCTCCCACTGCTGACGAAC               |
| RM2_R1      | AGTGTGACGGAATCGTTGCT              |
| RM2_F2      | CGCCCGAGATACAACATCCA              |
| RM2_R2      | GTTGCTTTTTCTCGACGTGCT             |
| CMCap_F     | GGCACTGTTGCAAATAGTCGGT            |
| CMCap_R     | GGCACTGTTGCAAAGTTAGCGA            |
| CMCapRE_F   | AAAAAGAATTCGGCACTGTTGCAAATAGTCGGT |
| CMCapRE_R   | AAAAAGGTACCGCACTGTTGCAAAGTTAGCGA  |
| CapCon_F1   | GGGGAAACGCCTGGTATCTT              |
| CapCon_R1   | TGACGGAATCGTTGCTGTTG              |
| CapCon_F2   | GCTGGGAATAGAACAGCCGA              |
| CapCon_R2   | CGGCTCGTATGTTGTGTGGA              |
| uidA_F      | TCTGGCAACCGGGTGAAG                |
| uidA R      | TAGATATCACACTCTGTCTGGCT           |
| TEM_F       | GGAACCGGAGCTGAATGAAG              |
| TEM_R       | TCAGCAATAAACCAGCCAGC              |

---

|         |                      |
|---------|----------------------|
| OXA-1_F | TGCATCCACAAACGCTGAAA |
|---------|----------------------|

---

|         |                      |
|---------|----------------------|
| OXA-1_R | TGCGAAACCCAAACAACAGA |
|---------|----------------------|

---

|        |                      |
|--------|----------------------|
| tetD_F | AGCAGAAACAAGAAAGCGCA |
|--------|----------------------|

---

|        |                      |
|--------|----------------------|
| tetD_R | TTCTCACTCAGCCGTTTTGC |
|--------|----------------------|

---

|              |                      |
|--------------|----------------------|
| aac(3)-IIa_F | GCATGCCTCACTTAAAGCGA |
|--------------|----------------------|

---

|              |                      |
|--------------|----------------------|
| aac(3)-IIa_R | ATTGATTCAGCAGGCCGAAC |
|--------------|----------------------|

---

|                 |                      |
|-----------------|----------------------|
| aac(6')-Ib-cr_F | CCCAGTCGTACGTTGCTCTT |
|-----------------|----------------------|

---

|                 |                      |
|-----------------|----------------------|
| aac(6')-Ib-cr_F | CCTCGGGATCATTGAACAGC |
|-----------------|----------------------|

---

A

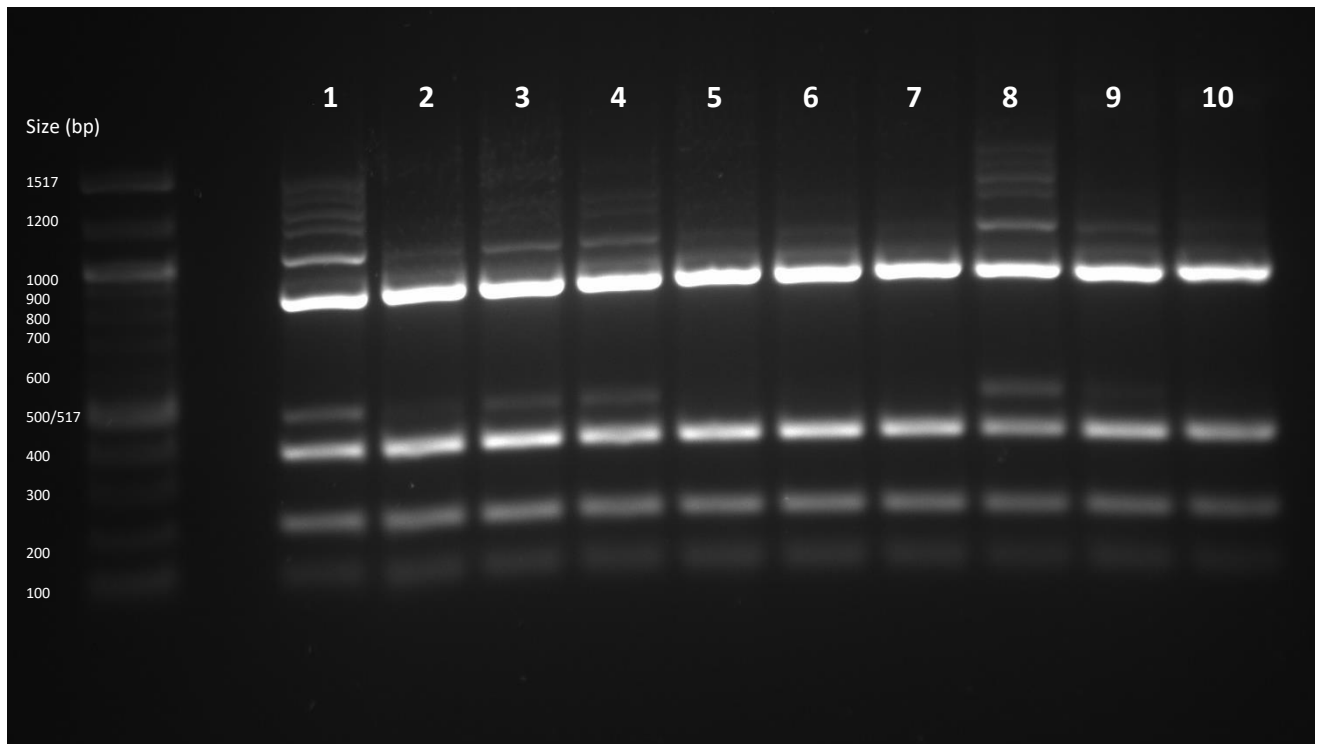

B

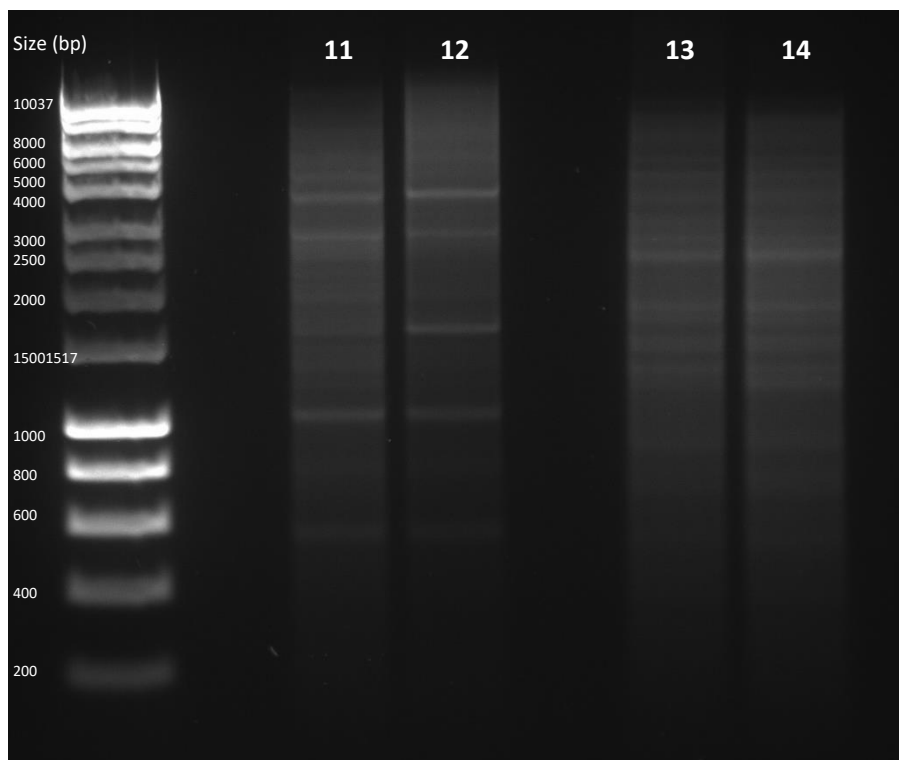

**Supplementary Figure 1: Only one pair isolates are presumptive clones.** Restriction fragment length polymorphism (RFLP) of **A)** 16S rRNA PCR amplicon of **1)** 151985, **2)** 153006, **3)** 101737, **4)** 102167, **5)** 153964, **6)** 152025, **7)** 155512, **8)** 154810, **9)** 190693 and **10)** 169757 digested with AlwNI, PpuHI and MslI. RFLP of **B)** long fragment genomic DNA extraction from **11)** 153964, **12)** 152025, **13)** 190693 and **14)** 169757 digested with SpeI and MslI. RFLP was performed as a single replicate ( $n=1$ ). Source data are provided as a Source Data file.

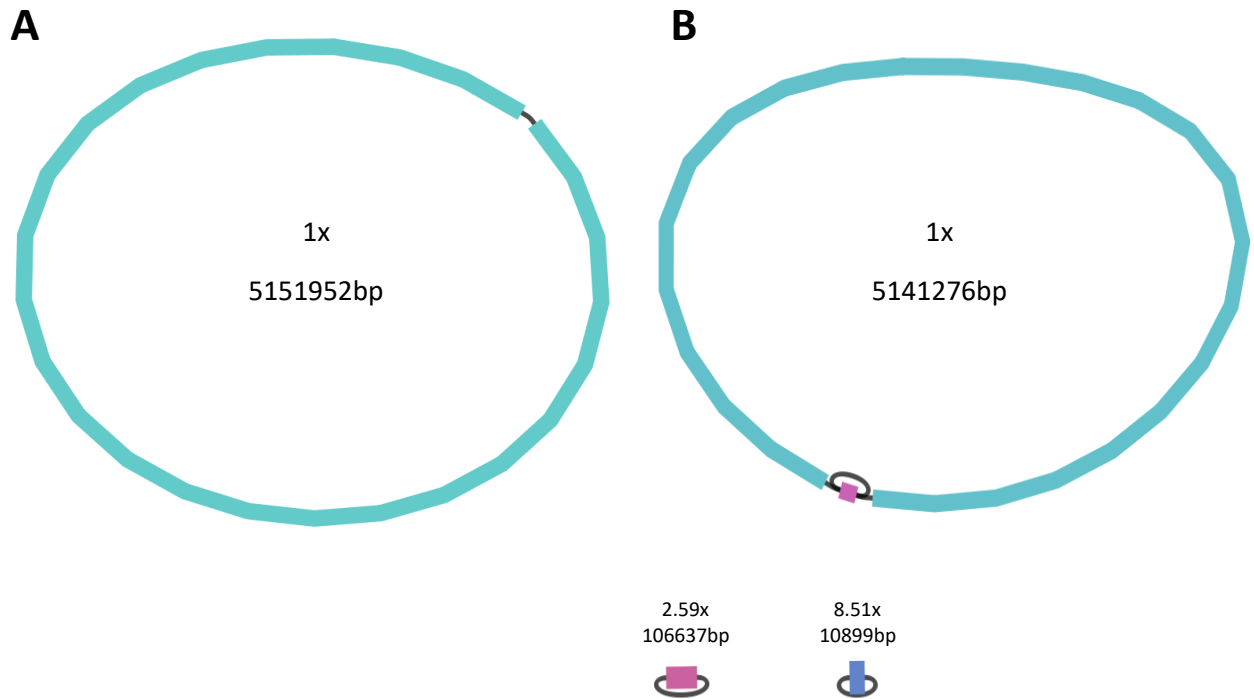

**Supplementary Figure 2: The piperacillin/tazobactam-resistant isolate contained a plasmid and circular DNA molecule which were not present in the piperacillin/tazobactam-susceptible isolate.**

Visualisation of the hybrid assembly of long and short read sequencing reads by Unicycler of the **A**) piperacillin/tazobactam (TZP)-susceptible isolate and **B**) and TZP-resistant isolate.

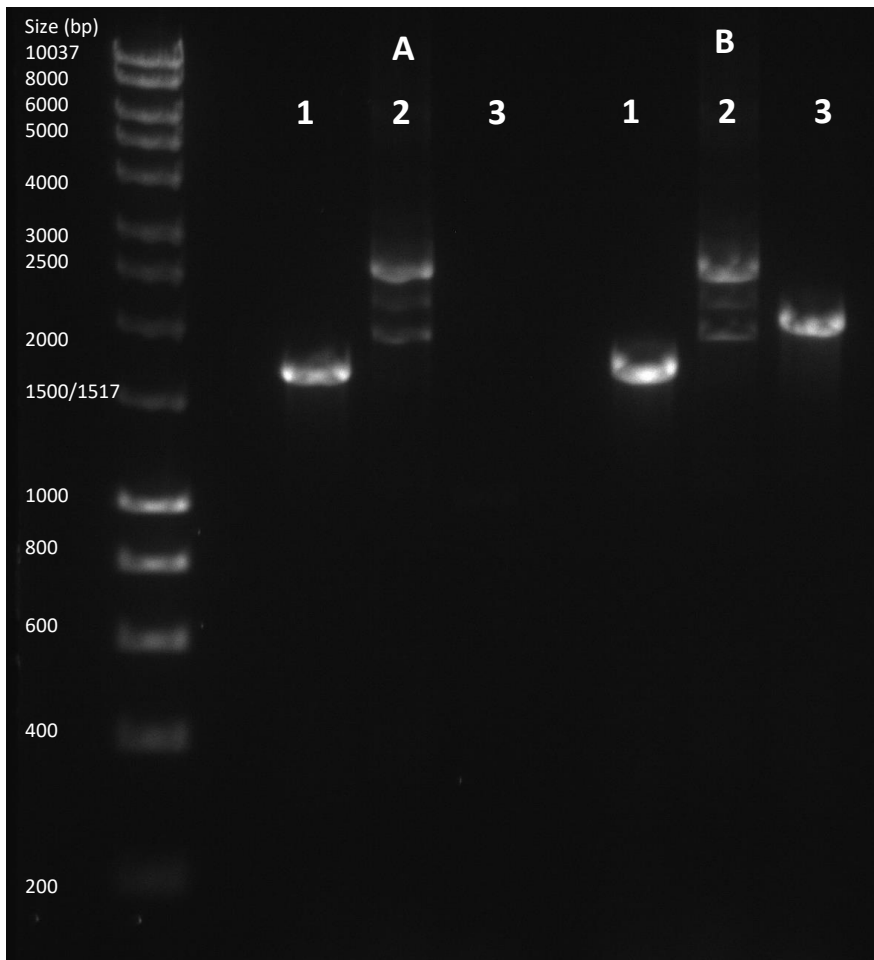

**Supplementary Figure 3: PTn6762 is present in the chromosome of both the piperacillin/tazobactam-resistant and piperacillin/tazobactam-susceptible isolate but exists as a tandem array in the resistant isolate only.** Gel electrophoresis of the PCR amplicons of the **1)** left junction of the chromosomally located IS26 and resistance module, **2)** right junction of the chromosomally located IS26 and resistance module and **3)** translocatable unit (TU) tandem array from **A)** piperacillin/tazobactam (TZP)-susceptible isolate and **B)** TZP-resistant isolate. PCR amplification was performed as a single replicate ( $n=1$ ). Source data are provided as a Source Data file.





A)

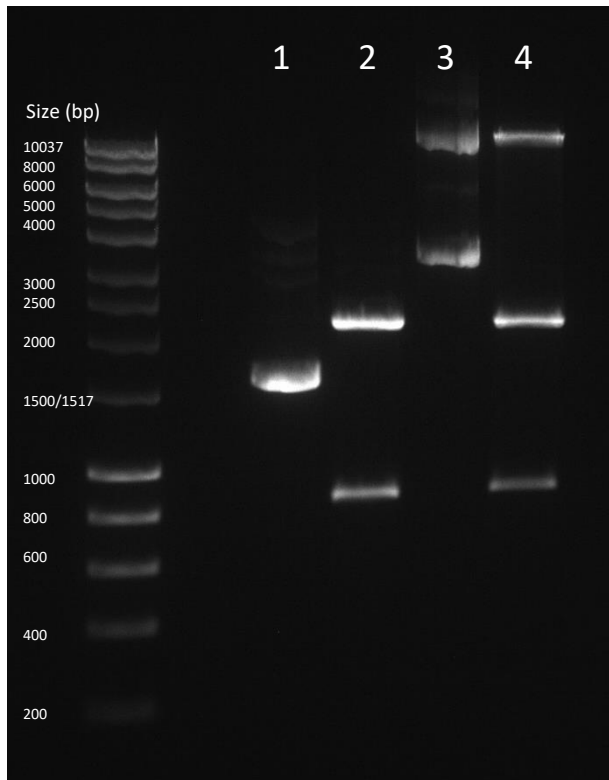

B)

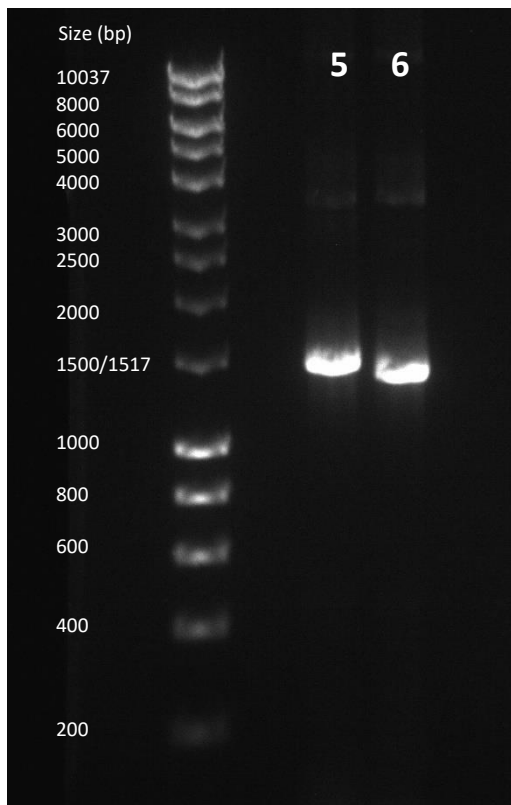

**Supplementary Figure 5: The translocatable unit was captured in the pHSG396:IS26 plasmid following replication of the evolutionary event. A)** Gel electrophoresis of **1)** undigested pHSG396:IS26, **2)** pHSG396:IS26 digested with XhoI and EcoRI, **3)** undigested pHSG396:IS26 after growth in the presence of 8/4 µg/ml piperacillin/tazobactam (TZP) and transformation in New England Biolabs (NEB)<sup>®</sup> 5-alpha competent *Escherichia coli* and **4)** pHSG396:IS26 digested with XhoI and EcoRI after growth in the presence of 8/4 µg/ml TZP and transformation in NEB<sup>®</sup> 5-alpha competent *E. coli* and **B)** gel electrophoresis of PCR amplicons from the **5)** left and **6)** right junctions of pHSG396:IS26 following insertion of the translocatable unit. Restriction digest and PCR amplification were performed as a single replicate ( $n=1$ ). Source data are provided as a Source Data file.

A

TCGACGGAGTTCCACTGAGCGTCAGACCCCGTAGAAAAGATCAAAGGATCTTCTTGAGATCCTTTTTCTGCGC  
GTAATCTGCTGCTTGCAAACAAAAAACCACCGCTACCAGCGGTGGTTTGTGGCCGGATCAAGAGCTACCAA  
CTCTTTTTCCGAAGGTAAGTGGCTTCAGCAGAGCGCAGATACCAAATACTGTTCTTCTAGTGTAGCCGTAGTTA  
GGCCACCACTTCAAGAACTCTGTAGCACCGCCTACATACCTCGCTCTGCTAATCCTGTTACCAGTGGCTGCTGC  
CAGTGGCGATAAGTCGTGTCTTACCGGGTTGGACTCAAGACGATAGTTACCGGATAAGGCGCAGCGGTCCGG  
CTGAACGGGGGGTTCGTGCACACAGCCCAGCTTGGAGCGAACGACCTACACCGAACTGAGATACCTACAGCG  
TGAGCTTATGAGAAAGCGCCACGCTTCCCGAAGGGAGAAAGGCGGACAGGTATCCGGTAAGCGGCAGGGTC  
GGAACAGGAGAGCGCACGAGGGAGCTTCCAGGGGGAAACGCCTGGTATCTTTATAGTCTGTGCGGTTTCGC  
CACCTCTGACTTGAGCGTCGATTTTTGTGATGCTCGTCAGGGGGGCGGAGCCTATGGAAAAACGCCAGCAAC  
GCGGCCTTTTTACGGTTCCTGGCCTTTTGTGCTGACATGTTCTTCTGCGTTATCCCCTGATTCTG  
TGGATAACCGTATTACCGCCTTTGAGTGAGCTGATACCGCTCGCCGAGCCGAACGACCGAGCGCAGCGAGT  
CAGTGAGCGAGGAAGCGGAAGAAGCTCATTGCCATTGAGGCTGCGCAACTGTTGGGAAGGGCGATCGGTG  
CGGGCCTCTTCGCTATTACGCCAGCTGGCGAAAGGGGGATGTGCTGCAAGGCGATTAAGTTGGGTAACGCCA  
GGTTTTCCAGTCACGACGTTGTAACGACGCGCCAGTGAATTCGGCACTGTTGCAAATAGTCGGTGGTGAT  
AACTTATCATCCCCTTTTGTGATGGAGCTGCACATGAACCCATTCAAAGGCCGGCATTTCAGCGTGACATC  
ATTCTGTGGGCCGTACGCTGGTACTGCAAATACGGCATCAGTTACCGTGAGCTGCAGGAGATGCTGGCTGAA  
CGCGGAGTGAATGTCGATCACTCCACGATTTACCGCTGGGTTACGCGTTATGCGCCTGAAATGGAAAAACGG  
CTGCGCTGGTACTGGCGTAACCTTCCGATCTTTGCCCGTGGCACATGGATGAAACCTACGTGAAGGTCAATG  
GCCGCTGGGCGTATCTGTACCGGGCCGTCGACAGCCGGGGCCGCACTGTCGATTTTTATCTCTCCTCCCGTCG  
TAACAGCAAAGCTGCATACCGTTTTCTGGGTAAAATCCTCAACAACGTGAAGAAGTGGCAGATCCCGCGATT  
ATCAACACGGATAAAGCGCCCGCCTATGGTCGCGCGCTTGCTCTGCTCAAACGCGAAGGCCGGTGCCCGTCTG  
ACGTTGAACACCGACAGATTAAGTACCGGAACAACGTGATTGAATGCGATCATGGCAAACGAAACGGATAA  
TCGGCGCCACGCTGGGATTTAAATCCATGAAGACGGCTTACGCCACCATCAAAGGTATTGAGGTGATGCGTG  
CACTACGCAAAGGCCAGGCCTCAGCATTTTATTATGGTGATCCCCTGGGCGAAATGCGCCTGGTAAGCAGAGT  
TTTTGAAATGTAAGGCCTTTGAATAAGACAAAAGGCTGCCTCATCGCTAACTTTGCAACAGTGCCGGTACCC

ATCGATGGGGGATCCTCTAGAGTCGACCCCTCGAGGGGCATGCAAGCTTGGCGTAATCATGGTCATAGCTGTT  
TCCTGTGTGAAATTGTTATCCGCTCACAATTCACACAACATACGAGCCGGAAGCATAAAGTGTAAGCCTGG  
GGTGCCTAATGAGTGAGCTAACTCACATTAATTGCGTTGCGCTCACTGCCCGCTTCCAGTCGGGAAACCTGTC  
GTGCCAGCTGCATTAATGAATCGGCCAACGCGCGGGGAGAGGCGGTTTGCGTATTGAGCTTGGCACTGGGCC  
AAGCTGAATTTCTGCCATTCATCCGCTTATTATCACTTATTCAGGCGTAGCAACCAGGCGTTTAAGGGCACCAA  
TAACTGCCTTAAAAAATTACGCCCCGCCCTGCCACTCATCGCAGTACTGTTGTAATTCATTAAGCATTCTGCCGA  
CATGGAAGCCATCACAAACGGCATGATGAACCTGAATCGCCAGCGGCATCAGCACCTTGTCGCCTTGCGTATA  
ATATTTGCCCATGGTGAAAACGGGGGCGAAGAAGTTGTCCATATTGGCCACGTTTAAATCAAAACTGGTGAA  
ACTCACCCAGGGATTGGCTGAGACGAAAAACATATTCTCAATAAACCCTTTAGGGAAATAGGCCAGGTTTTCA  
CCGTAACACGCCACATCTTGCGAATATATGTGTAGAAACTGCCGAAATCGTCGTGGTATTCACTCCAGAGCG  
ATGAAAACGTTTCAGTTTGCTCATGGAAAACGGTGTAACAAGGGTGAACACTATCCCATATCACCAGCTCACC  
GTCTTTCATTGCCATACGAAATTCGGATGAGCATTATCAGGCGGGCAAGAATGTGAATAAAGGCCGGATA  
AAACTTGTGCTTATTTTTCTTACGGTCTTTAAAAAGGCCGTAATATCCAGCTGAACGGTCTGGTTATAGGTAC  
ATTGAGCAACTGACTGAAATGCCTCAAATGTTCTTACGATGCCATTGGGATATATCAACGGTGGTATATCCA  
GTGATTTTTTTCTCCATTTTAGCTTCTTAGCTCCTGAAAATCTCGATAACTCAAAAAATACGCCCCGTAGTGAT  
CTTATTTTATTATGGTGAAAGTTGGAACCTTACGTGCCGATCAACGTCTCATTTCGCCAAAAGTTGGCCCA  
GGGCTTCCCGGTATCAACAGGGACACCAGGATTTATTTATTCTGCGAAGTGATCTTCCGT

B

GGCACTGTTGCAAATAGTCGGTGGTGATAAACTTATCATCCCCTTTTGCTGATGGAGCTGCACATGAACCCATT  
CAAAGGCCGGCATTTCAGCGTGACATCATTCTGTGGCCGTACGCTGGTACTGCAAATACGGCATCAGTTAC  
CGTGAGCTGCAGGAGATGCTGGCTGAACGCGGAGTGAATGTCGATCACTCCACGATTTACCGCTGGGTTTACG  
CGTTATGCGCCTGAAATGGAAAAACGGCTGCGCTGGTACTGGCGTAACCCTTCCGATCTTTGCCCGTGGCACA  
TGGATGAAACCTACGTGAAGGTCAATGGCCGCTGGGCGTATCTGTACCGGGCCGTCGACAGCCGGGGCCGCA  
CTGTCGATTTTTATCTCTCCTCCCGTCGTAACAGCAAAGCTGCATACCGGTTTCTGGGTAAAATCCTCAACAAC  
GTGAAGAAGTGGCAGATCCCGGATTCATCAACACGGATAAAGCGCCCCCTATGGTCGCGCGCTTGCTCTG  
CTCAAACGCGAAGGCCGGTGCCCGTCTGACGTTGAACACCGACAGATTAAGTACCGGAACAACGTGATTGAA

TGCGATCATGGCAAACCTGAAACGGATAATCGGGGCCACGCTGGGATTTAAATCCATGAAGACGGCTTACGCC  
ACCATCAAAGGTATTGAGGTGATGCGTGCACTACGCAAAGGCCAGGCCTCAGCATTTTATTATGGTGATCCCC  
TGGGCGAAATGCGCCTGGTAAGCAGAGTTTTTGAATGTAAGGCCTTTGAATAAGACAAAAGGCTGCCTCAT  
CGCTAACTTTGCAACAGTGCCTTTAAGCGTGCATAATAAGCCCTACACAAATTGGGAGTTAGACATCATGAGC  
AACGCAAAAACAAAGTTAGGCATCACAAAGTACAGCATCGTGACCAACAGCAACGATTCCGTCACTGCGCC  
TCATGACTGAGCATGACCTTGCATGCTCTATGAGTGGCTAAATCGATCTCATATCGTCGAGTGGTGGGGCGG  
AGAAGAAGCACGCCCCGACACTTGCTGACGTACAGGAACAGTACTTGCCAAGCGTTTTAGCGCAAGAGTCCGT  
CACTCCATACATTGCAATGCTGAATGGAGAGCCGATTGGGTATGCCAGTCGTACGTTGCTCTTGAAGCGGG  
GACGGACGGTGGGAAGAAGAAACCGATCCAGGAGTACGCGGAATAGACCAGTTACTGGCGAATGCATCACA  
ACTGGGCAAAGGCTTGGGAACCAAGCTGGTTCGAGCTCTGGTTGAGTTGCTGTTCAATGATCCCGAGGTCACC  
AAGATCCAAACGGACCCGTCGCCGAGCAACTTGCAGCGATCCGATGCTACGAGAAAGCGGGGTTTGAGAG  
GCAAGGTACCGTAACCACCCCATATGGTCCAGCCGTGTACATGGTTCAAACACGCCAGGCATTGAGCGAACA  
CGCAGTGATGCCTAACCTTCCATCGAGGGGGACGTCCAAGGGCTGGCGCCCTTGCCCGCCCTCATGTCAA  
CGTTGGGCGAACCCGAGCCTCATTAAATTGTTAGCCGTTAAAATTAAGCCCTTTACCAAACCAATACTTATTAT  
GAAAAACACAATACATATCAACTTCGCTATTTTTTTAATAATTGCAAATATTATCTACAGCAGCGCCAGTGCATC  
AACAGATATCTCTACTGTTGCATCTCCATTATTTGAAGGAACTGAAGGTTGTTTTTACTTTACGATGCATCCAC  
AAACGCTGAAATTGCTCAATTCAATAAAGCAAAGTGTGCAACGCAAATGGCACCAGATTCAACTTTCAAGATC  
GCATTATCACTTATGGCATTGATGCGGAAATAATAGATCAGAAAACCATATTCAAATGGGATAAAAACCCCA  
AAGGAATGGAGATCTGGAACAGCAATCATACACCAAAGACGTGGATGCAATTTTCTGTTGTTTGGGTTTCGCA  
AGAAATAACCCAAAAAATTGGATTAATAAAATCAAGAATTATCTCAAAGATTTTGATTATGGAAATCAAGAC  
TTCTCTGGAGATAAAGAAAGAAACAACGGATTAACAGAAGCATGGCTCGAAAGTAGCTTAAAAATTTACCA  
GAAGAACAAATTCAATTCCTGCGTAAAATTATTAATCACAATCTCCAGTTAAAACTCAGCCATAGAAAACAC  
CATAGAGAACATGTATCTACAAGATCTGGATAATAGTACAAAACCTGTATGGGAAAACCTGGTGCAGGATTACA  
GCAAATAGAACCTTACAAAACGGATGGTTTGAAGGGTTTATTATAAGCAAATCAGGACATAAATATGTTTTTG  
TGTCGCACTTACAGGAACTTGGGGTCGAATTTAACATCAAGCATAAAAAGCCAAGAAAAATGCGATCACCAT  
TCTAAACACACTAAATTTATAAAAAATCTAATGGCAAATCGCCCAACCCTTCAATCAAGTCGGGACGGCCAA

AAGCAAGCTTTTGGCTCCCCTCGCTGGCGCTCGGCGCCCCTTATTTCAAACGTTAGACGGCAAAGTCACAGAC  
CGCGGGATCTCTTATGACCAACTACTTTGATAGCCCCTCAAAGGCAAGCTGCTTTCTGAGCAAGTGAAGAAC  
CCCAATATCAAAGTTGGGCGGTACAGCTATTACTCTGGCTACTATCATGGGCACTCATTGATGACTGCGCAC  
GGTATCTGTTTCCGGACCGTGATGACGTTGATAAGTTGATCATCGGTAGTTTCTGCTCTATCGGGAGTGGGGC  
TTCCTTTATCATGGCTGGCAATCAGGGGCATCGGTACGACTGGGCATCATCTTCCCGTTCTTTTATATGCAGG  
AAGAACCTGCATTCTCAAGCGCACTCGATGCCTTCCAAAAGCAGGTAATACTGTCATTGGCAATGACGTTTG  
GATCGGCTCTGAGGCAATGGTCATGCCCCGGAATCAAGATCGGGCACGGTGCGGTGATAGGCAGCCGCTCGTT  
GGTGACAAAAGATGTGGGGCACTGTTGCAAAGTTAGCGATGAGGCAGCCTTTTGTCTTATTCAAAGGCCTTAC  
ATTTCAAAAACCTCTGCTTACCAGGCGCATTTCGCCAGGGGATCACCATAATAAAATGCTGAGGCCTGGCCTTT  
GCGTAGTGACGCATCACCTCAATACCTTTGATGGTGGCGTAAGCCGTCTTCATGGATTTAAATCCCAGCGTG  
GCGCCGATTATCCGTTTCAGTTTGCCATGATCGCATTCAATCACGTTGTTCCGGTACTTAATCTGTCGGTGTTCA  
ACGTCAGACGGGCACCGGCCTTCGCGTTTGAGCAGAGCAAGCGCGGACCATAGGCGGGCGCTTTATCCGTG  
TTGATGAATCGCGGGATCTGCCACTTCTTCACGTTGTTGAGGATTTTACCCAGAAACCGGTATGCAGCTTTGCT  
GTTACGACGGGAGGAGAGATAAAAATCGACAGTGCGGCCCGGCTGTCGACGGCCCGGTACAGATACGCC  
AGCGGCCATTGACCTTCACGTAGTTTTATCCATGTGCCACGGGCAAAGATCGGAAGGGTTACGCCAGTACCA  
GCGCAGCCGTTTTTCCATTTAGGCGCATAACGCTGAACCCAGCGGTAAATCGTGGAGTGATCGACATTCCT  
CCGCGTTCAGCCAGCATCTCCTGCAGCTCACGGTAACTGATGCCGTATTTGCAGTACCAGCGTACGGCCACA  
GAATGATGTCACGCTGAAAATGCCGGCCTTTGAATGGGTTTCATGTGCAGCTCCATCAGCAAAGGGGATGAT  
AAGTTTATCACCACCGACTATTTGCAACAGTGCCTCTCGATAGGTATAGTGTTTTGCAGTTTAGAGGAGATATC  
GCGATGCATACGCGGAAGGCAATAACGGAGGCAATTCGAAAATTAGGAGTCAAACCGGTGACCTGTTGATG  
GTGCATGCCTCACTTAAAGCGATTGGTCCGGTTCGAAGGAGGAGCGGAGACGGTCGTTGCCGCGTTACGCTCC  
GCGGTTGGGCCGACTGGCACTGTGATGGGATACGCGTCGTGGGACCGATCACCTACGAGGAGACTCTGAAT  
GGCGCTCGGTTGGATGACAAAGCCCGCCGTACCTGGCCCGGTTTCGATCCCGCAACGGCCGGGACTTACCGT  
GGGTTGCGCCTGCTGAATCAATTTCTGGTTCAAGCCCCGGCGCGGGCGCAGCGCGCACCCCGATGCATCG  
ATGGTCGCGGTTGGTCCGCTAGCTGAAACGCTGACGGAGCCTCACGAACTCGGTCACGCCTTGGGGGAAGGG  
TCGCCCGTCGAGCGGTTTCGTCGCCCTTGGCGGGAAGGCCCTGCTGTTGGGTGCGCCGCTAAACTCCGTTACCG

CATTGCACTACGCCGAGGCGGTTGCGGATATCCCCAACAAACGATGGGTGACGTATGAGATGCCGATGCTTG  
GAAGAAACGGTGAAGTCGCCTGGAAAACGGCATCAGAATACGATTCAAACGGCATTCTCGATTGCTTTGCTAT  
CGAAGGAAAGCCGGATGCGGTGCGAACTATAGCAAATGCTTACGTGAAGCTCGGTGCGCCATCGAGAAGGTGT  
CGTGGGCTTTGCTCAGTGCTACCTGTTGACGCGCAGGACATCGTGACGTTGCGGCGTCACCTATCTTGAGAAG  
CACTTCGGAGCCACTCCGATCGTGCCAGCACACGAAGCCGCCAGCGCTTTGCGAGCCTTCCGGTTAGAGGC  
CGTCGACAATGATAATCTGGATCAACGGACCTTTGCGCGCCGAAAGACGACTCTCGCTGAGCGGCTGCGCG  
ATCGGCGTCCGAAATCGCTGATCTTTGACCCTGAGGAAATCGGGTTCGTGGTGAAGAAACGGTCCCCATACC  
AGCGAGCGGAGACTATCAGGATCTCCCCTGTGGAGGGGACTTACGATCGCTGCGGTCAGCGAGATTCGCAG  
GAATTACTCGCAGGACATCATCATCCAATGACGCTCGTGACCCGGACTATCTGACTGAGATACTCGACGGG  
TTAAGGCAGATCGACGATCAGCTGCTGCACATCTTTCTGATGCTTAACGAGGACCTATTGCGTCACCGGATCTC  
GAACCAGACCATGCATCCTGACCCGAATCGGAATGCGGAGATTGAGAGTGGCGATTAGCGAATGTCGCCCCG  
ATGCTTGGCCGCAAGGGAACGGCTTCCGTCCACAACCCGTGTTCTCGATAGTGGTGCACACACCAGCGATGAA  
CTTGACGCGATGGTGCTCGACAGACTCGATCAGCGCACCTGATCGCCTTAGAGCTGGCTCGGAAATCTGCAC  
AGCGGGGATAAGTGGAGTTTCTGCCTGACTTCGGCTTAGATGCCGGGAACAGGAGAGACCATGACGAGACG  
ACCGCGCCGGAACCATAGCCCGGCTTTCAAGGCGAAGGTGGCACTTGCCGCCATCCGAGGTGAGCAGACGCT  
GGTGGAGTTGTCCAGCAGTTCGATGTGCACGCCAACCAGATCAAGCAATGGAAAGACCAGCTCCTTGAGGG  
GGCGACAGGTGTGTTGCGCGATGAAACGAAAGCGGAGCCGTGCGGTCCGACCATCGATGTCAAACGCTGC  
ACGCGAAAATCGGCGAACTGACACTGGAGAACGATTTTTTATCCGGTGCCTCGGCAAGGCGGGATTGCTGG  
GCGGAAAGAAATGATCGACCGGAGCACAAGCTATCCGTGCTGCGCCAGGCGAAGCTTCTCGGCTTCAGCCG  
TGGCAGCGTCTACTATCTGCCTCGTCCGGTGTCTGACGGCGATCTGGCCCTTATGCGCCGGATTGACGAATTG  
CATCTCGACTACCCCTTTGCCGGAAGTCGGATGTTGCAAGGGCTCTTGAGAGGAGAAGGTCTGGAGACCGGG  
CGGCGACACGTCGCCACGCTGATGAAGAAGATGGGCATCAAGGCGATCTACCGCCGCCGAACACCTCGAAA  
CCAGCGCCAGGGCACATACGAAAGCTGGCAGTCAACCGGCCCAATCAGGTGTGGGCAATGGACCTGACCTAC  
ATCCCCATGGCGCGGGGATTTGTCTATCTGTGCGCCGTGCTGGACTGGTTCAGCCGGAAGGTCTTGTGATGGC  
GGTTGTGATCACGATGGAAGCAGCCTTCTGCATCGAGGCGGTGGAGGAGGCACTTGCCCGTCATGGCAGGC  
CGGAAATCTTCAATACCGACCAGGGATCGCAGTTCACCTCCATCGACTTCACCGCCGTGCTGAAGAGGTCACA

GATTGCCATCTCGATGGATGGCAAGGGTGCCTGGCGAGACAATGTCTTCGTCGAGCGGCTCTGGCGTTTCGAT  
CAAATACGAGGAAGTCTACCTCCATGCCTACAAGACTGTGTCCGAGGCACGCGCTGGCATCGCCCGATATCTG  
AACTTCTACAACACCAGACGCCACATTGGCACTGTTGCAAAGTTAGCGATGAGGCAGCCTTTTGTCTTATTCA  
AAGGCCTTACATTTCAAAAACCTCTGCTTACCAGGCGCATTTCGCCAGGGGATCACCATAATAAAATGCTGAG  
GCCTGGCCTTTGCGTAGTGACGCATCACCTCAATACCTTTGATGGTGGCGTAAGCCGTCTTCATGGATTTAAA  
TCCCAGCGTGGCGCCGATTATCCGTTTCAGTTTGCCATGATCGCATTCAATCACGTTGTTCCGGTACTTAATCTG  
TCGGTGTTC AACGTCAGACGGGCACCGGCCTTCGCGTTTGAGCAGAGCAAGCGCGGACCATAGGCGGGCGC  
TTTATCCGTGTTGATGAATCGCGGGATCTGCCACTTCTTCACGTTGTTGAGGATTTTACCCAGAAACCGGTATG  
CAGCTTTGCTGTTACGACGGGAGGAGAGATAAAAATCGACAGTGCGGCCCCGGCTGTCGACGGCCCCGTACA  
GATACGCCAGCGGCCATTGACCTTCACGTAGGTTTCATCCATGTGCCACGGGCAAAGATCGGAAGGGTTAC  
GCCAGTACCAGCGCAGCCGTTTTTCCATTTAGGCGCATAACGCTGAACCCAGCGGTAATCGTGGAGTGATC  
GACATTCCTCCGCTTCAGCCAGCATCTCCTGCAGCTCACGGTAACTGATGCCGTATTTGCAGTACCAGCGTA  
CGGCCACAGAATGATGTCACGCTGAAAATGCCGGCCTTTGAATGGGTTTCATGTGCAGCTCCATCAGCAAAAG  
GGGATGATAAGTTTATCACCACCGACTATTTGCAACAGTGCCCAAATGGTGGTCACCATCCTGTCGGCTGTGG  
CACAGGCTGAACGCCGGAGGATCCTAGAACGCACGAATGAGGGCCGACAGGAAGCAAAGCTGAAAGGAATC  
AAATTTGGCCGCAGGCGTACCGTGGACAGGAACGTCGTGCTGACGCTTCATCAGAAGGGCACTGGTGCAACG  
GAAATTGCTCATCAGCTCAGTATTGCCCGCTCCACGGTTTATAAAATTCTTGAAGACGAAAGGGCCTCGTGAT  
ACGCCTATTTTTATAGGTTAATGTCATGATAATAATGGTTTCTTAGACGTCAGGTGGCACTTTTCGGGGAAATG  
TGC GCGGAACCCCTATTTGTTTATTTTTCTAAATACATTCAAATATGTATCCGCTCATGAGACAATAACCCCTGGT  
AAATGCTTCAATAATATTGAAAAAGGAAGAGTATGAGTATTCAACATTTTCGTGTCGCCCTTATTCCCTTTTTG  
CGGCATTTTGCCTTCTGTTTTGCTCACCCAGAAACGCTGGTGAAAGTAAAAGATGCTGAAGATCAGTTGGG  
TGCACGAGTGGGTTACATCGAACTGGATCTCAACAGCGGTAAGATCCTTGAGAGTTTTCGCCCCGAAGAACGT  
TTTCCAATGATGAGCACTTTTAAAGTTCTGCTATGTGGTGCGGTATTATCCCGTGTGACGCCGGGCAAGAGC  
AACTCGGTGCGCCATACACTATTCTCAGAATGACTTGGTTGAGTACTCACCAGTCACAGAAAAGCATCTTACG  
GATGGCATGACAGTAAGAGAATTATGCAGTGCTGCCATAACCATGAGTGATAAACTGCTGCCAACTTACTTC  
TGACAACGATCGGAGGACCGAAGGAGCTAACCGCTTTTTTGCACAACATGGGGGATCATGTAACCTCGCCTTG



ATCGTTGGGAACCGGAGCTGAATGAAGCCATACCAAACGACGAGCGTGACACCACGATGCCTGCAGCAATGG  
CAACAACGTTGCGCAAACCTATTAAGTGGCGAACTACTTACTCTAGCTTCCCGGCAACAATTAATAGACTGGATG  
GAGGCGGATAAAGTTGCAGGACCACTTCTGCGCTCGGCCCTTCCGGCTGGCTGGTTTATTGCTGATAAATCTG  
GAGCCGGTGAGCGTGGGTCTGCGGGTATCATTGCAGCACTGGGGCCAGATGGTAAGCCCTCCCGTATCGTAG  
TTATCTACACGACGGGGAGTCAGGCAACTATGGATGAACGAAATAGACAGATCGCTGAGATAGGTGCCTCAC  
TGATTAAGCATTGGTAACTGTCAGACCAAGTTTACTCATATATACTTTAGATTGATTTAAAACCTTCATTTTTAAT  
TTAAAAGGATCTAGGTGAAGATCCTTTTTGATAATCTCATGACCAAATCCCTAACGTGAGTTTTCGTTCCACT  
GAGCGTCAGACCCCGTTTCACACTGGTCACGCCCTCACCGACCTCAACCACCACCCCGGCACCTTCATGGCCGA  
GCACCACCGGGAACAGACCTTCCGGATCATCACCGAAAGCGTGTAGGCATCGGTATGGCATAACCCCGGTGT  
GACTGATTTTACCAGCACTTACCTTTCTTCGGCGGTGCCACATCAATTTCAACAATTTCAAGGGGTAAACCC  
GGCCGAAGGCGACTGCTGCGCGTGATTCATAACGTTTCTCTGTGTCTGAGGCTTATCATGGCAGGCGATA  
AGCACGAATGCCGTCCACCATACCGCACAACAGCGCTGCCTGTATAGCGCCGGTCAGCAGGTGGCCGCCACC  
GGTGCCGGTTTTCTGATCAGCAGACAGATTGCCAGCAGCAGACCGTACAGTGCCGTGCCAATCAGCCACACC  
GTACCGTCCGCACTCTGCTGTGTCTGACTGAAAATAAAAGCAAACAGCAGCGGGCCCGCCACGCCGGTCAGA  
TTGGTCAGGCTGACCAGCACACCCTGTAGTTTTCCCTGATTTGCCGCCGATGCCCGGCAGAGATAATGCCCT  
GCAATGCAGGCAGTGCAATTCGCCCGCTGCCAGCAGGATCAGGACCGGATACCCATCCATCCGGAAGTGA  
TAGCAGACATCAGTAAAAACGCGGTGGCATCGGCAATAAATCCGGCGAAAATAATGGTTTTCTCACTCAGCCG  
TTTTGCCAGCGCCCCGCAACCACCGCCTGAAACAGTGCATGCATCGCCCCGAGTCCCGCCAGTGAAAAACCG  
ACCGCCGCGCTGTCCAGGCAAAGCGGCTCTCCGTAAACAATACCCAGACAGTGCCCGGGATCTGCCCGATA  
AGCTGCGCGGTAAAAAAGACAAACAGCAACAGCGCCAGAGGTTAAGCAGTGTGATAAAGCTGATACCTGCG  
CTTTCTTGTCTGCTCCGCCGGTTTTTCTTCTGTCTGTACCGCCGGTTTAAAGATAAAAAAGACCATCAGAAAG  
GTGCAGGCATTAGTATTGCCGCAATGACAAACGGCAGATGCGGTGAGATATCCCCGCCAGTCCGCCGATA  
GCCGGCCCGCAATCAGCCCGGCACCAAAGGCCGCACCGAGACGGCCGAACCAGGCGGTACGCTCGCTGAC  
CGCCGTGCTGTCCGCCACTACCGAAGCCGCAACCGCGCCGGTGGCACCAGTGATCCCGGAGATAATCCGCC  
GAGATAACAATCCACAGCACATTGGACAGTGCCAGCAGTGTGTAATCAAACGCGGCACCCGCCAGGGATAA  
CAGCAGCACCGGTCTGCGCCCCAGCTTATCTGACCATCTGCCAGCAGCGGAGCAAACAGACCTGCATCACC

GCATACAGCGCCAGCAGAATGCCGTAATGGTTTGCCACATCCGCTTCCGGGAGATATTCCCGCAGCAGTGACG  
GTAATACCGGCATGATCAGACCAATTCCCATCGCGTCCAGCAGTGTAATCACCAGCGCGATGACAGCGGGTTT  
ATTCATTTTTAGATCCTGTGTTAATCCCTATCATTGATAGAGTTGGAATATATCCCTATCAATGATAGAGTGT  
CAATCTGAAAATCGGAGGAGACGGTCATGGCACGGCTGAACAGAGAATCGGTTATTGATGCGGCACTGGAA  
CTGCTGAATGAGACAGGGATTGACGGGCTGACGACCCGCAAGCTGGCGCAGAAGCTGGGAATAGAACAGCC  
GACACTTTACTGGCATGTGAAAAATAAACGGGCGTACTGGATGCGCTGGCGGTGGAGATCCTGGCGCGTCA  
TCATGATTATTCAGTGCCTGCGGCGGGGAATCCTGGCAGTCATTTCTGCGCAATAATGCAATGAGTTTCCGC  
CGGGCGCTGCTGCGTTACCGTGACGGGGCAAAGTGACCTCGGCACCCGCCCTGATGAAAAACAGTATGAT  
ACGGTGAAACCCAGTTACGCTTTATGACAGAAAACGGCTTTTCACTGCGCGACGGTTATATGCGATTTAG  
CGGTCAGTCATTTTACCCTTGGTGCCGTAAGTGGAGCAGCAGGAGCATACTGCCGCCCTGACCGACCGCCCTGC  
AGCACCGGACGAAAACCTGCCGCCGCTATTGCGGGAAGCGCTGCAGATTATGGACAGTGATGATGGTGAGC  
AGGCCTTTCTGCATGGCCTGGAGAGCCTGATCCGGGGGTTTGAGGTGCAGCTTACGGCACTGTTGCAAATAG  
TCGGTGGTGATAAACTTATCATCCCCTTTGCTGATGGAGCTGCACATGAACCCATTCAAAGGCCGGCATTTC  
AGCGTGACATCATTCTGTGGGCCGTACGCTGGTACTGCAAATACGGCATCAGTTACCGTGAGCTGCAGGAGA  
TGCTGGCTGAACGCGGAGTGAATGTCGATCACTCCACGATTTACCGCTGGGTTTACGCGTTATGCGCCTGAAAT  
GGAAAAACGGCTGCGCTGGTACTGGCGTAACCCTTCCGATCTTTGCCCGTGGCACATGGATGAAACCTACGTG  
AAGGTCAATGGCCGCTGGGCGTATCTGTACCGGGCCGTCGACAGCCGGGGCCGCACTGTGCGATTTTTATCTCT  
CCTCCCGTCGTAACAGCAAAGCTGCATACCGGTTTCTGGGTAAAATCCTCAACAACGTGAAGAAGTGGCAGAT  
CCCGCGATTCATCAACACGGATAAAGCGCCCCGCTATGGTCGCGCGCTTGCTCTGCTCAAACGCGAAGGCCGG  
TGCCCGTCTGACGTTGAACACCGACAGATTAAGTACCGGAACAACGTGATTGAATGCGATCATGGCAAACCTG  
AAACGGATAATCGGCGCCACGCTGGGATTTAAATCCATGAAGACGGCTTACGCCACCATCAAAGGTATTGAG  
GTGATGCGTGCACTACGCAAAGGCCAGGCCTCAGCATTTTATTATGGTATCCCCTGGGCGAAATGCGCCTGG  
TAAGCAGAGTTTTTCAAATGTAAGGCCTTTGAATAAGACAAAAGGCTGCCTCATCGCTAACTTTGCAACAGTG  
CCGGTACCCCATCGATGGGGGATCCTCTAGAGTCGACCCCTCGAGGGGCATGCAAGCTTGGCGTAATCATGG  
TCATAGCTGTTTCTGTGTGAAATTGTTATCCGCTCACAATTCCACACAACATACGAGCCGGAAGCATAAAGTG  
TAAAGCCTGGGGTGCCTAATGAGTGAGCTAACTCACATTAATTGCGTTGCGCTCACTGCCCGCTTCCAGTCG

GAAACCTGTCGTGCCAGCTGCATTAATGAATCGGCCAACGCGCGGGGAGAGGCGGTTTTCGTATTGAGCTT  
GGCACTGGGCCAAGCTGAATTTCTGCCATTCATCCGCTTATTATCACTTATTCAGGCGTAGCAACCAGGCGTTT  
AAGGGCACCAATAACTGCCTTAAAAAATTACGCCCCGCCTGCCACTCATCGCAGTACTGTTGTAATTCATTAA  
GCATTCTGCCGACATGGAAGCCATCACAAACGGCATGATGAACCTGAATCGCCAGCGGCATCAGCACCTTGTC  
GCCTTTCGTATAATATTTGCCATGGTGAAAACGGGGCGAAGAAGTTGTCCATATTGCCACGTTTAAATCA  
AAACTGGTGAAACTCACCCAGGGATTGGCTGAGACGAAAAACATATTCTCAATAAACCTTTAGGGAAATAG  
GCCAGGTTTTACCGTAACACGCCACATCTTGCGAATATATGTGTAGAAACTGCCGAAATCGTCGTGGTATT  
CACTCCAGAGCGATGAAAACGTTTCAGTTTGCTCATGGAAAACGGTGTAAACAAGGGTGAACACTATCCCATAT  
CACCAGCTCACCGTCTTTTATTGCCATACGAAATTCCGGATGAGCATTTCATCAGGCGGGCAAGAATGTGAATA  
AAGGCCGATAAACTTGTGCTTATTTTTCTTTACGGTCTTTAAAAAGGCCGTAATATCCAGCTGAACGGTCTG  
GTTATAGGTACATTGAGCAACTGACTGAAATGCCTCAAATGTTCTTTACGATGCCATTGGGATATATCAACG  
GTGGTATATCCAGTGATTTTTTTCTCCATTTTAGCTTCCTTAGCTCCTGAAAATCTCGATAACTCAAAAAATACG  
CCCGGTAGTGATCTTATTTTATTATGGTGAAAGTTGGAACCTCTTACGTGCCGATCAACGTCTCATTTCGCCA  
AAAGTTGGCCCAGGGCTTCCCGGTATCAACAGGGACACCAGGATTTATTTATTCTGCGAAGTGATCTTCCGTTT  
GACGGAGTTCCACTGAGCGTCAGACCCCGTAGAAAAGATCAAAGGATCTTCTTGAGATCCTTTTTTCTGCGCG  
TAATCTGCTGCTTGCAAACAAAAAACCACCGCTACCAGCGGTGGTTTGTGGCCGGATCAAGAGCTACCAAC  
TCTTTTTCCGAAGGTAAGTGGCTTACGAGAGCGCAGATACCAAATACTGTTCTTCTAGTGTAGCCGTAGTTAG  
GCCACCACTTCAAGAACTCTGTAGCACCCTACATACCTCGCTCTGCTAATCCTGTTACCAGTGGCTGCTGCC  
AGTGGCGATAAGTCGTGTCTTACCGGGTTGACTCAAGACGATAGTTACCGGATAAGGCGCAGCGGTCGGGC  
TGAACGGGGGGTTCGTGCACACAGCCCAGCTTGGAGCGAACGACCTACACCGAACTGAGATACCTACAGCGT  
GAGCTTATGAGAAAGCGCCACGCTTCCCGAAGGGAGAAAGGCGGACAGGTATCCGGTAAGCGGCAGGGTTCG  
GAACAGGAGAGCGCACGAGGGAGCTTCCAGGGGGAAACGCCTGGTATCTTTATAGTCTGTGGGGTTTCGCC  
ACCTCTGACTTGAGCGTCGATTTTTGTGATGCTCGTCAGGGGGCGGAGCCTATGGAAAAACGCCAGCAACG  
CGGCCTTTTTACGGTTCCTGGCCTTTTGTGGCCTTTTGTCCACATGTTCTTTCTGCGTTATCCCCTGATTCTGT  
GGATAACCGTATTACCGCCTTTGAGTGAGCTGATACCGCTCGCCGACCGAACGACCGAGCGCAGCGAGTC  
AGTGAGCGAGGAAGCGGAAGAAGCTCATTGCCATTTCAGGCTGCGCAACTGTTGGGAAGGGCGATCGGTGC

GGGCCTCTTCGCTATTACGCCAGCTGGCGAAAGGGGGATGTGCTGCAAGGCGATTAAGTTGGGTAACGCCAG  
GGTTTTCCCAGTCACGACGTTGTAAAACGACGGCCAGTGAATTC

C

GGCACTGTTGCAAATAGTCGGTGGTGATAAACTTATCATCCCCTTTTGTGATGGAGCTGCACATGAACCCATT  
CAAAGGCCGGCATTTCAGCGTGACATCATTCTGTGGGCCGTACGCTGGTACTGCAAATACGGCATCAGTTAC  
CGTGAGCTGCAGGAGATGCTGGCTGAACGCGGAGTGAATGTCGATCACTCCACGATTTACCGCTGGGTTTACG  
CGTTATGCGCCTGAAATGGAAAAACGGCTGCGCTGGTACTGGCGTAACCCCTCCGATCTTTGCCCGTGGCACA  
TGGATGAAACCTACGTGAAGGTCAATGGCCGCTGGGCGTATCTGTACCGGGCCGTCGACAGCCGGGGCCGCA  
CTGTGATTTTTATCTCTCCTCCCGTCGTAACAGCAAAGCTGCATACCGGTTTCTGGGTAAAATCCTCAACAAC  
GTGAAGAAGTGGCAGATCCCGCGATTCATCAACACGGATAAAGCGCCCGCCTATGGTCGCGCGCTTGCTCTG  
CTCAAACGCGAAGGCCGGTGCCCGTCTGACGTTGAACACCGACAGATTAAGTACCGGAACAACGTGATTGAA  
TGGCATCATGGCAAACCTGAAACGGATAATCGGCGCCACGCTGGGATTTAAATCCATGAAGACGGCTTACGCC  
ACCATCAAAGGTATTGAGGTGATGCGTGCCTACGCAAAGGCCAGGCCTCAGCATTATTTATTATGGTGATCCCC  
TGGGCGAAATGCGCCTGGTAAGCAGAGTTTTTGAATGTAAGGCCTTTGAATAAGACAAAAGGCTGCCTCAT  
CGCTAACTTTGCAACAGTGCCTTTAAGCGTGCATAATAAGCCCTACACAAATTGGGAGTTAGACATCATGAGC  
AACGCAAAAACAAAGTTAGGCATCACAAAGTACAGCATCGTGACCAACAGCAACGATTCCGTCACACTGCGCC  
TCATGACTGAGCATGACCTTGCATGCTCTATGAGTGGCTAAATCGATCTCATATCGTCGAGTGGTGGGGCGG  
AGAAGAAGCACGCCCACACTTGCTGACGTACAGGAACAGTACTTGCCAAGCGTTTTAGCGCAAGAGTCCGT  
CACTCCATACATTGCAATGCTGAATGGAGAGCCGATTGGGTATGCCAGTCGTACGTTGCTCTTGAAGCGGG  
GACGGACGGTGGGAAGAAGAAACCGATCCAGGAGTACGCGGAATAGACCAGTTACTGGCGAATGCATCACA  
ACTGGGCAAAGGCTTGGGAACCAAGCTGGTTTCGAGCTCTGGTTGAGTTGCTGTTCAATGATCCCGAGGTCACC  
AAGATCCAAACGGACCCGTCGCCGAGCAACTTGCAGCGATCCGATGCTACGAGAAAGCGGGGTTTGAAGAG  
GCAAGGTACCGTAACCACCCCATATGGTCCAGCCGTGTACATGGTTCAAACACGCCAGGCATTTCGAGCGAACA  
CGCAGTGATGCCTAACCTTCCATCGAGGGGGACGTCCAAGGGCTGGCGCCCTTGCCCGCCCTCATGTCAA  
CGTTGGGCGAACC CGGAGCCTCATTAATTGTTAGCCGTTAAAATTAAGCCCTTTACCAAACCAATACTTATTAT  
GAAAAACACAATACATATCAACTTCGCTATTTTTTTAATAATTGCAAATATTATCTACAGCAGCGCCAGTGCATC

AACAGATATCTCTACTGTTGCATCTCCATTATTTGAAGGAACTGAAGGTTGTTTTTACTTTACGATGCATCCAC  
AAACGCTGAAATTGCTCAATCAATAAAGCAAAGTGTGCAACGCAAATGGCACCAGATTCAACTTTCAAGATC  
GCATTATCACTTATGGCATTGATGCGGAAATAATAGATCAGAAAACCATATTCAAATGGGATAAAACCCCA  
AAGGAATGGAGATCTGGAACAGCAATCATAACCAAAGACGTGGATGCAATTTTCTGTTGTTGGGTTTCGCA  
AGAAATAACCCAAAAAATTGGATTAATAAAAATCAAGAATTATCTCAAAGATTTGATTATGGAAATCAAGAC  
TTCTCTGGAGATAAAGAAAGAAACAACGGATTAACAGAAGCATGGCTCGAAAGTAGCTTAAAAATTTACC  
AGAAGAACAATTCAATTCCTGCGTAAAATTATTAATCACAATCTCCAGTTAAAAACTCAGCCATAGAAAACA  
CCATAGAGAACATGTATCTACAAGATCTGGATAATAGTACAAAATGTATGGGAAAATGGTGCAGGATTAC  
AGCAAATAGAACCTTACAAAACGGATGGTTTGAAGGGTTTATTATAAGCAAATCAGGACATAAATATGTTTT  
GTGTCCGCACTTACAGGAACTTGGGGTCGAATTTAACATCAAGCATAAAAGCCAAGAAAAATGCGATCACCA  
TTCTAAACACACTAAATTTATAAAAAATCTAATGGCAAATCGCCCAACCCTTCAATCAAGTCGGGACGGCCAA  
AAGCAAGCTTTTGGCTCCCCTCGCTGGCGCTCGGCGCCCTTATTTCAAACGTTAGACGGCAAAGTCACAGAC  
CGCGGGATCTCTTATGACCAACTACTTTGATAGCCCTTCAAAGGCAAGCTGCTTTCTGAGCAAGTGAAGAAC  
CCCAATATCAAAGTTGGGCGGTACAGCTATTACTCTGGCTACTATCATGGGCACTCATTGATGACTGCGCAC  
GGTATCTGTTTCCGGACCGTGATGACGTTGATAAGTTGATCATCGGTAGTTTCTGCTCTATCGGGAGTGGGGC  
TTCCTTATCATGGCTGGCAATCAGGGGCATCGGTACGACTGGGCATCATCTTCCCGTTCTTTTATATGCAGG  
AAGAACCTGCATTCTCAAGCGCACTCGATGCCTTCCAAAAGCAGGTAATACTGTCATTGGCAATGACGTTTG  
GATCGGCTCTGAGGCAATGGTCATGCCCGGAATCAAGATCGGGCACGGTGCGGTGATAGGCAGCCGCTCGTT  
GGTGACAAAAGATGTGGGGCACTGTTGCAAAGTTAGCGATGAGGCAGCCTTTTGTCTTATTCAAAGGCCTTAC  
ATTTCAAAAATCTGCTTACCAGGCGCATTTGCCCGAGGGGATCACCATAATAAATGCTGAGGCCTGGCCTTT  
GCGTAGTGACGCATCACCTCAATACCTTTGATGGTGGCGTAAGCCGTCTTCATGGATTTAAATCCCAGCGTG  
GCGCCGATTATCCGTTTCAGTTTGCCATGATCGCATTCAATCACGTTGTTCCGGTACTTAATCTGTCGGTGTTCA  
ACGTCAGACGGGCACCGCCTTCGCGTTTGAGCAGAGCAAGCGCGGACCATAGGCGGGCGCTTTATCCGTG  
TTGATGAATCGCGGGATCTGCCACTTCTCACGTTGTTGAGGATTTTACCCAGAAACCGGTATGCAGCTTTGCT  
GTTACGACGGGAGGAGAGATAAAAATCGACAGTGCGGCCCCGGCTGTCGACGGCCCCGGTACAGATACGCC  
AGCGGCCATTGACCTTACGTAGGTTTTCATCCATGTGCCACGGGCAAAGATCGGAAGGGTTACGCCAGTACCA

GCGCAGCCGTTTTCCATTTAGGCGCATAACGCTGAACCCAGCGGTAAATCGTGGAGTGATCGACATTCCT  
CCGCGTTCAGCCAGCATCTCCTGCAGCTCACGGTAACTGATGCCGTATTTGCAGTACCAGCGTACGGCCCACA  
GAATGATGTCACGCTGAAAATGCCGGCCTTTGAATGGGTTTCATGTGCAGCTCCATCAGCAAAGGGGATGAT  
AAGTTTATCACCACCGACTATTTGCAACAGTGCCTCTCGATAGGTATAGTGTTTTGCAGTTTAGAGGAGATATC  
GCGATGCATACGCGGAAGGCAATAACGGAGGCAATTCGAAAATTAGGAGTCAAACCCGGTGACCTGTTGATG  
GTGCATGCCTCACTTAAAGCGATTGGTCCGGTTCGAAGGAGGAGCGGAGACGGTCGTTGCCGCGTTACGCTCC  
GCGGTTGGGCCGACTGGCACTGTGATGGGATACGCGTCGTGGGACCGATCACCTACGAGGAGACTCTGAAT  
GGCGCTCGGTTGGATGACAAAGCCCGCCGTACCTGGCCGCCGTTTCGATCCCGCAACGGCCGGGACTTACCGT  
GGGTTGCGCCTGCTGAATCAATTTCTGGTTCAAGCCCCGGCGCGCGGCGCAGCGCGCACCCCGATGCATCG  
ATGGTCGCGGTTGGTCCGCTAGCTGAAACGCTGACGGAGCCTCACGAACTCGGTCACGCCTTGGGGGAAGGG  
TCGCCCCTCGAGCGGTTCTCCGCTTGGCGGGAAGGCCCTGCTGTTGGGTGCGCCGCTAAACTCCGTTACCG  
CATTGCACTACGCCGAGGCGGTTGCGGATATCCCCAACAAACGATGGGTGACGTATGAGATGCCGATGCTTG  
GAAGAAACGGTGAAGTCGCTGAAAACGGCATCAGAATACGATTCAAACGGCATTCTCGATTGCTTTGCTAT  
CGAAGGAAAGCCGGATGCGGTTCGAACTATAGCAAATGCTTACGTGAAGCTCGGTCGCCATCGAGAAGGTGT  
CGTGGGCTTTGCTCAGTGCTACCTGTTGACGCGCAGGACATCGTGACGTTCCGGCGTCACCTATCTTGAGAAG  
CACTTCGGAGCCACTCCGATCGTGCCAGCACACGAAGCCGCCAGCGCTCTTGCGAGCCTTCCGGTTAGAGGC  
CGTCGACAATGATAATCTGGATCAACGGACCTTTCCGGCGCCGAAAGACGACTCTCGCTGAGCGGCTGCGCG  
ATCGGCGTCCGAAATCGCTGATCTTTGACCCTGAGGAAATCGGGTTCGTGGTGAAAGAAACGGTCCCCATACC  
AGCGAGCGGAGACTATCAGGATCTCCCCTTGTGGAGGGGACTTACGATCGCTGCGGTGAGCGAGATTGCGAG  
GAATTACTCGCAGGACATCATCATCCAATGACGCTCGTGACCCGGACTATCTGACTGAGATACTCGACGGG  
TTAAGGCAGATCGACGATCAGCTGCTGCACATCTTTCTGATGCTTAACGAGGACCTATTGCGTCACCGGATCTC  
GAACCAGACCATGCATCCTGACCCGAATCGGAATGCGGAGATTGAGAGTGGCGATTAGCGAATGTCGCCCC  
ATGCTTGGCCGCAAGGGAACGGCTTCCGTCCACAACCCGTGTTCTCGATAGTGGTGACACACCAGCGATGAA  
CTTGACGCGATGGTGCTCGACAGACTCGATCAGCGCACCTGATCGCCTTAGAGCTGGCTCGGGAAATCTGCAC  
AGCGGGGATAAGTGGAGTTTCTGCCTGACTTCGGCTTAGATGCCGGGAACAGGAGAGACCATGACGAGACG  
ACCGCGCCGGAACCATAGCCCGGCTTTCAAGGCGAAGGTGGCACTTGCCGCCATCCGAGGTGAGCAGACGCT

GGTGGAGTTGTCCAGCAGTTCGATGTGCACGCCAACAGATCAAGCAATGGAAAGACCAGCTCCTTGAGGG  
GGCGACAGGTGTGTTGCGCGATGAAACGAAAGCGGAGCCGTGCGGTCCGACCATCGATGTCAAACGCTGC  
ACGCGAAAATCGGCGAACTGACACTGGAGAACGATTTTTATCCGGTGCCTCGGCAAGGCGGGATTGCTGG  
GCGGAAAGAAATGATCGACCGCGAGCACAAGCTATCCGTCTGCGCCAGGCCAAGCTTCTCGGCTTCAGCCG  
TGGCAGCGTCTACTATCTGCCTCGTCCGGTGTCTGACGGCGATCTGGCCCTTATGCGCCGGATTGACGAATTG  
CATCTCGACTACCCCTTTGCCGGAAGTCGGATGTTGCAAGGGCTCTTGAGAGGAGAAGGTCTGGAGACCGGG  
CGGCGACACGTCGCCACGCTGATGAAGAAGATGGGCATCAAGGCGATCTACCGCCGCCGAACACCTCGAAA  
CCAGCGCCAGGGCACATACGAAAGCTGGCAGTCACCCGGCCCAATCAGGTGTGGGCAATGGACCTGACCTAC  
ATCCCATGGCGCGGGGATTTGTCTATCTGTGCGCCGTCTGGACTGGTTCAGCCGGAAGGTCTTGTGATGGC  
GGTTGTCGATCACGATGGAAGCAGCCTTCTGCATCGAGGCGGTGGAGGAGGCACTTGCCCGTCATGGCAGGC  
CGGAAATCTTCAATACCGACCAGGGATCGCAGTTCACCTCCATCGACTTCACCGCCGTGCTGAAGAGGTCACA  
GATTGCCATCTCGATGGATGGCAAGGGTGCCTGGCGAGACAATGTCTTCGTCGAGCGGCTCTGGCGTTGAT  
CAAATACGAGGAAGTCTACCTCCATGCCTACAAGACTGTGTCCGAGGCACGCGCTGGCATCGCCGATATCTG  
AACTTCTACAACACCAGACGCCACATTGGCACTGTTGCAAAGTTAGCGATGAGGCAGCCTTTTGTCTTATTCA  
AAGGCCTTACATTTCAAAAATCTGCTTACCAGGCGCATTTCCGCCAGGGGATCACCATAATAAAATGCTGAG  
GCCTGGCCTTTGCGTAGTGACGCATCACCTCAATACCTTTGATGGTGGCGTAAGCCGTCTTCATGGATTTAAA  
TCCCAGCGTGGCGCCGATTATCCGTTTCAGTTTGCCATGATCGCATTCAATCACGTTGTTCCGGTACTTAATCTG  
TCGGTGTTC AACGTCAGACGGGCACCGCCTTCGCGTTTGAGCAGAGCAAGCGCGGACCATAGGCGGGCGC  
TTTATCCGTGTTGATGAATCGCGGATCTGCCACTTCTCACGTTGTTGAGGATTTTACCCAGAAACCGGTATG  
CAGCTTTGCTGTTACGACGGGAGGAGAGATAAAAATCGACAGTGCGGCCCCGGCTGTCGACGGCCCCGTACA  
GATACGCCCAGCGGCCATTGACCTTCACGTAGGTTTCATCCATGTGCCACGGGCAAAGATCGGAAGGGTTAC  
GCCAGTACCAGCGCAGCCGTTTTTCCATTTAGGCGCATAACGCTGAACCCAGCGGTAATCGTGGAGTGATC  
GACATTCACCTCCGCTTCAGCCAGCATCTCCTGCAGCTCACGGTAACTGATGCCGTATTTGCAGTACCAGCGTA  
CGGCCACAGAATGATGTCACGCTGAAAATGCCGGCCTTTGAATGGGTTTCATGTGCAGCTCCATCAGCAAAAAG  
GGGATGATAAGTTTATCACCACCGACTATTTGCAACAGTGCCCAAATGGTGGTCACCATCCTGTCGGCTGTGG  
CACAGGCTGAACGCCGGAGGATCCTAGAACGCACGAATGAGGGCCGACAGGAAGCAAAGCTGAAAGGAATC

AAATTTGGCCGCAGGCGTACCGTGGACAGGAACGTCGTGCTGACGCTTCATCAGAAGGGCACTGGTGCAACG  
GAAATTGCTCATCAGCTCAGTATTGCCCGCTCCACGGTTTATAAAATTCTTGAAGACGAAAGGGCCTCGTGAT  
ACGCCTATTTTTATAGGTTAATGTCATGATAATAATGGTTTCTTAGACGTCAGGTGGCACTTTTCGGGGAAATG  
TGCGCGGAACCCCTATTTGTTTATTTTTCTAAATACATTCAAATATGTATCCGCTCATGAGACAATAACCCCTGGT  
AAATGCTTCAATAATATTGAAAAAGGAAGAGTATGAGTATTCAACATTTTCGTGTCGCCCTTATTCCCTTTTTTG  
CGGCATTTTGCCTTCTGTTTTTGCTCACCCAGAAACGCTGGTGAAAGTAAAGATGCTGAAGATCAGTTGGG  
TGCACGAGTGGGTTACATCGAACTGGATCTCAACAGCGGTAAGATCCTTGAGAGTTTTCGCCCCGAAGAACGT  
TTTCCAATGATGAGCACTTTTAAAGTTCTGCTATGTGGTGCGGTATTATCCCGTGTTGACGCCGGGCAAGAGC  
AACTCGGTGCGGCATACACTATTCTCAGAATGACTTGGTTGAGTACTCACCAGTCACAGAAAAGCATCTTACG  
GATGGCATGACAGTAAGAGAATTATGCAGTGCTGCCATAACCATGAGTGATAAACTGCTGCCAACTTACTTC  
TGACAACGATCGGAGGACCGAAGGAGCTAACCGCTTTTTTGACAACATGGGGGATCATGTAACTCGCCTTG  
ATCGTTGGGAACCGGAGCTGAATGAAGCCATACCAAACGACGAGCGTGACACCACGATGCCTGCAGCAATGG  
CAACAACGTTGCGCAAACCTATTAAGTGGCGAACTACTTACTCTAGCTTCCCGGCAACAATTAATAGACTGGATG  
GAGGCGGATAAAGTTGCAGGACCACTTCTGCGCTCGGCCCTTCCGGCTGGCTGGTTTATTGCTGATAAATCTG  
GAGCCGGTGAGCGTGGGTCTCGCGGTATCATTGCAGCACTGGGGCCAGATGGTAAGCCCTCCCGTATCGTAG  
TTATCTACACGACGGGGAGTCAGGCAACTATGGATGAACGAAATAGACAGATCGCTGAGATAGGTGCCTCAC  
TGATTAAGCATTGGTAACTGTCAGACCAAGTTTACTCATATATACTTTAGATTGATTTAAAACCTTCATTTTTAAT  
TTAAAAGGATCTAGGTGAAGATCCTTTTTGATAATCTCATGACCAAATCCCTTAACGTGAGTTTTCGTTCCACT  
GAGCGTCAGACCCCGTTTCACACTGGTCACGCCCTCACCGACCTCAACCACCACCCCGGCACCTTCATGGCCGA  
GCACCACCGGGAACAGACCTTCCGGATCATCACCGGAAAGCGTGTAGGCATCGGTATGGCATAACCCCGGTGT  
GACTGATTTTACCAGCACTTACCTTTCTCGGCGGTGCCACATCAATTTCAACAATTTCAAGGGGTAAACCC  
GGCCGAAGGCGACTGCTGCGCGTGATTCATAACGGTTCCTCTGTGTCTGAGGCTTATCATGGCAGGCGATA  
AGCACGAATGCCGTCCACCATACCGCACAACAGCGCTGCCTGTATAGCGCCGGTCAGCAGGTGGCCGCCACC  
GGTGCCGTTTTCTGATCAGCAGACAGATTGCCAGCAGCAGACCGTACAGTGCCGTGCCAATCAGCCACACC  
GTACCGTCCGCACTCTGCTGTGTCTGACTGAAAATAAAAGCAAACAGCAGCGGGCCCGCCACGCCGGTCAGA  
TTGGTCAGGCTGACCAGCACACCCTGTAGTTTTCCCTGATTTGCCGCCGATGCCCCGGCAGAGATAATGCCCT



GCAATGCAGGCAGTGCAATTCCGCCGCTGCCAGCAGGATCAGGACCGGATACACCATCCATCCGGAAGTGA  
TAGCAGACATCAGTAAAAACGCGGTGGCATCGGCAATAAATCCGGCGAAAATAATGGTTTTCTACTCAGCCG  
TTTTGCCAGCGCCCCGGCAACCACCGCCTGAAACAGTGCATGCATCGCCCCGAGTCCC GCCAGTGAAAAACCG  
ACCGCCGCGCTGTCCCAGGCAAAGCGGCTCTCCGTAAACAATACCCAGACAGTGGCCGGGATCTGCCCGATA  
AGCTGCGCGGTAAAAAAGACAAACAGCAACAGCGCCAGAGGTTTAAGCAGTGTGATAAAGCTGATACCTGCG  
CTTTCTGTTTCTGCTCCGCCGTTTTTCTTCTGTCTGTACCGCCGTTTAAAGATAAAAAAGACCATCAGAAAG  
GTGCAGGCATTAGTATTGCCGCAATGACAAACGGCAGATGCGGTGAGATATCCCCGCCAGTCCGCCGATA  
GCCGGCCCCGGCAATCAGCCCCGGCACCAAAGGCCGACCGAGACGGCCGAACCAGGCGGTACGCTCGCTGAC  
CGCCGTGCTGTCCGCCACTACCGAAGCCGCAACCGCGCCGTTGGCACCAGTGATCCCGGAGATAATCCGCC  
GAGATAACAATCCACAGCACATTGGACAGTGCCAGCAGTGTGTAATCAAACGCGGCACCCGCCAGGGATAA  
CAGCAGCACCGGTCTGCGCCCCAGCTTATCTGACCATCTGCCAGCAGCGGAGCAAAACAGACCTGCATCACC  
GCATACAGCGCCAGCAGAATGCCGTAATGGTTTGCCACATCCGCTTCCGGGAGATATCCCGCAGCAGTGACG  
GTAATACCGGCATGATCAGACCAATTCCCATCGCGTCCAGCAGTGTGTAATCACCAGCGCGATGACAGCGGGTTT  
ATTCATTTTTCAGATCCTGTGTTAATCCCTATCATTGATAGAGTTGGAATATATCCCTATCAATGATAGAGTGT  
CAATCTGAAAATCGGAGGAGACGGTCATGGCACGGCTGAACAGAGAATCGGTTATTGATGCGGCACTGGAA  
CTGCTGAATGAGACAGGGATTGACGGGCTGACGACCCGCAAGCTGGCGCAGAAGCTGGGAATAGAACAGCC  
GACACTTTACTGGCATGTGAAAAATAAACGGGCGTTACTGGATGCGCTGGCGGTGGAGATCCTGGCGCGTCA  
TCATGATTATTCAGTGCCTGCGGCGGGGAATCCTGGCAGTCATTTCTGCGCAATAATGCAATGAGTTTCCGC  
CGGGCGCTGCTGCGTTACCGTGACGGGGCAAAGTGACCTCGGCACCCGCCCTGATGAAAAACAGTATGAT  
ACGGTGGAAACCCAGTTACGCTTTATGACAGAAAACGGCTTTTACTGCGCGACGGGTTATATGCGATTTAG  
CGGTCAGTCATTTTACCCTTGGTGCCGTAAGTGGAGCAGCAGGAGCATACTGCCGCCCTGACCGACCGCCCTGC  
AGCACCGGACGAAAACCTGCCGCCGCTATTGCGGGAAGCGCTGCAGATTATGGACAGTGTGATGGTGAGC  
AGGCCTTTCTGCATGGCCTGGAGAGCCTGATCCGGGGGTTTGGAGTGCAGCTTACGGCACTGTTGCAAATAG  
TCGGTGGTGATAAACTTATCATCCCCTTTTGTGATGGAGCTGCACATGAACCCATTCAAAGGCCGGCATTTC  
AGCGTGACATCATTCTGTGGGCCGTACGCTGGTACTGCAAATACGGCATCAGTTACCGTGAGCTGCAGGAGA  
TGCTGGCTGAACGCGGAGTGAATGTCGATCACTCCACGATTTACCGCTGGGTTTACGCGTTATGCGCCTGAAAT

GGAAAAACGGCTGCGCTGGTACTGGCGTAACCCTCCGATCTTTGCCCGTGGCACATGGATGAAACCTACGTG  
AAGGTCAATGGCCGCTGGGCGTATCTGTACCGGGCCGTCGACAGCCGGGGCCGCACTGTCGATTTTTATCTCT  
CCTCCCGTCGTAACAGCAAAGCTGCATACCGGTTTCTGGGTAAAATCCTCAACAACGTGAAGAAGTGGCAGAT  
CCC GCGATT CATCAACACGGATAAAGCGCCCCGCTATGGTCGCGCGCTTGCTCTGCTCAAACGCGAAGGCCGG  
TGCCCGTCTGACGTTGAACACCGACAGATTAAGTACCGGAACAACGTGATTGAATGCGATCATGGCAAAC TG  
AAACGGATAATCGGCGCCACGCTGGGATTTAAATCCATGAAGACGGCTTACGCCACCATCAAAGGTATTGAG  
GTGATGCGTGCACTACGCAAAGGCCAGGCCTCAGCATTTTATTATGGTGATCCCCTGGGCGAAATGCGCCTGG  
TAAGCAGAGTTTTTGAAATGTAAGGCCTTTGAATAAGACAAAAGGCTGCCTCATCGCTAACTTTGCAACAGTG  
CCGGTACCCCATCGATGGGGGATCCTCTAGAGTCGACCCCTCGAGGGGCATGCAAGCTTGGCGTAATCATGG  
TCATAGCTGTTTCTGTGTGAAATTGTTATCCGCTCACAATTCCACACAACATAACGAGCCGGAAGCATAAAGTG  
TAAAGCCTGGGGTGCCTAATGAGTGAGCTAACTCACATTAATTGCGTTGCGCTCACTGCCCGCTTCCAGTCG  
GGAAACCTGTCGTGCCAGCTGCATTAATGAATCGGCCAACGCGCGGGGAGAGGCGGTTTTGCGTATTGAGCTT  
GGCACTGGGCCAAGCTGAATTTCTGCCATTCATCCGCTTATTATCACTTATTCAGGCGTAGCAACCAGGCGTTT  
AAGGGCACCAATAACTGCCTTAAAAAATTACGCCCCGCCCTGCCACTCATCGCAGTACTGTTGTAATTCATTAA  
GCATTCTGCCGACATGGAAGCCATCACAACGGCATGATGAACCTGAATCGCCAGCGGCATCAGCACCTTGTC  
GCCTTGCGTATAATATTTGCCCATGGTGAAAACGGGGGCGAAGAAGTTGTCCATATTGGCCACGTTTAAATCA  
AAACTGGTGAAACTCACCCAGGGATTGGCTGAGACGAAAAACATATTCTCAATAAACCCCTTTAGGGAAATAG  
GCCAGGTTTTACCGTAACACGCCACATCTTGCGAATATATGTGTAGAAACTGCCGGAATCGTCGTGGTATT  
CACTCCAGAGCGATGAAAACGTTTCAGTTTGCTCATGGAAAACGGTGTAAACAAGGGTGAACACTATCCCATAT  
CACCAGCTCACCGTCTTTCATTGCCATACGAAATTCGGATGAGCATTATCAGGCGGGCAAGAATGTGAATA  
AAGGCCGATAAACTTGTGCTTATTTTTCTTACGGTCTTTAAAAAGGCCGTAATATCCAGCTGAACGGTCTG  
GTTATAGGTACATTGAGCAACTGACTGAAATGCCTCAAATGTTCTTTACGATGCCATTGGGATATATCAACG  
GTGGTATATCCAGTGATTTTTTTCTCCATTTTAGCTTCCTTAGCTCCTGAAAATCTCGATAACTCAAAAATACG  
CCC GG TAGTGATCTTATTTTATTATGGTGAAAGTTGGAACCTCTTACGTGCCGATCAACGTCTCATTTCGCCA  
AAAGTTGGCCCAGGGCTTCCCGGTATCAACAGGGACACCAGGATTTATTTATTCTGCGAAGTGATCTTCCGTTT  
GACGGAGTTCCACTGAGCGTCAGACCCCGTAGAAAAGATCAAAGGATCTTCTTGAGATCCTTTTTTCTGCGCG

TAATCTGCTGCTTGCAAACAAAAAACCACCGCTACCAGCGGTGGTTTGTGGCCGGATCAAGAGCTACCAAC  
TCTTTTTCCGAAGGTAAGTGGCTTCAGCAGAGCGCAGATACCAAATACTGTTCTTCTAGTGTAGCCGTAGTTAG  
GCCACCACTTCAAGAACTCTGTAGCACCGCCTACATACCTCGCTCTGCTAATCCTGTTACCAGTGGCTGCTGCC  
AGTGGCGATAAGTCGTGTCTTACCGGGTTGACTCAAGACGATAGTTACCGGATAAGGCGCAGCGGTGCGGGC  
TGAACGGGGGGTTCGTGCACACAGCCCAGCTTGGAGCGAACGACCTACACCGAACTGAGATACCTACAGCGT  
GAGCTATGAGAAAGCGCCACGCTTCCCGAAGGGAGAAAGGCGGACAGGTATCCGGTAAGCGGCAGGGTGC  
GAACAGGAGAGCGCACGAGGGAGCTTCCAGGGGGAAACGCCTGGTATCTTTATAGTCTGTGCGGGTTTCGCC  
ACCTCTGACTTGAGCGTCGATTTTTGTGATGCTCGTCAGGGGGCGGAGCCTATGGAAAAACGCCAGCAACGC  
GGCCTTTTTACGGTTCCTGGCCTTTTGTGCTGGCCTTTTGTGCTCACATGTTCTTCTGCGTTATCCCCTGATTCTGTG  
GATAACCGTATTACCGCCTTTGAGTGAGCTGATACCGCTCGCCGACGCCGAACGACCGAGCGCAGCGAGTCA  
GTGAGCGAGGAAGCGGAAGAAGCTCATTGCCATTGAGGCTGCGCAACTGTTGGGAAGGGCGATCGGTGCG  
GGCCTCTTCGCTATTACGCCAGCTGGCGAAAGGGGGATGTGCTGCAAGGCGATTAAGTTGGGTAACGCCAGG  
GTTTTCCAGTCACGACGTTGTAACACGACGGCCAGTGAATTCGGCACTGTTGCAAATAGTCGGTGGTGATAA  
ACTTATCATCCCCTTTTGTGATGGAGCTGCACATGAACCCATTCAAAGGCCGGCATTTCAGCGTGACATCAT  
TCTGTGGGCCGTACGCTGGTACTGCAAATACGGCATCAGTTACCGTGAGCTGCAGGAGATGCTGGCTGAACG  
CGGAGTGAATGTCGATCACTCCACGATTTACCGCTGGGTTGAGCGTTATGCGCCTGAAATGGAAAAACGGCTG  
CGCTGGTACTGGCGTAACCCTTCCGATCTTTGCCCGTGGCACATGGATGAAACCTACGTGAAGGTCAATGGCC  
GCTGGGCGTATCTGTACCGGGCCGTGACAGCCGGGGCCGCACTGTCGATTTTTATCTCTCTCCCGTCGTAA  
CAGCAAAGCTGCATACCGGTTTCTGGGTAAAATCCTCAACAACGTGAAGAAGTGGCAGATCCCGCGATTTCATC  
AACACGGATAAAGCGCCCGCTATGGTCGCGCGCTTGTCTGCTCAAACGCGAAGGCCGGTGGCCGTCTGAC  
GTTGAACACCGACAGATTAAGTACCGGAACAACGTGATTGAATGCGATCATGGCAAACCTGAAACGGATAATC  
GGCGCCACGCTGGGATTTAAATCCATGAAGACGGCTTACGCCACCATCAAAGGTATTGAGGTGATGCGTGCA  
CTACGCAAAGGCCAGGCCTCAGCATTTTATTATGGTGATCCCCTGGGCGAAATGCGCCTGGTAAGCAGAGTTT  
TTGAAATGTAAGGCCTTTGAATAAGACAAAAGGCTGCCTCATCGCTAACTTTGCAACAGTGCCTTTAAGCGTG  
CATAATAAGCCCTACACAAATTGGGAGTTAGACATCATGAGCAACGCAAAAACAAAGTTAGGCATCACAAG  
TACAGCATCGTGACCAACAGCAACGATTCCGTGCACTGCGCCTCATGACTGAGCATGACCTTGGCGATGCTCT

ATGAGTGGCTAAATCGATCTCATATCGTCGAGTGGTGGGGCGGAGAAGAAGCACGCCCACACTTGCTGACG  
TACAGGAACAGTACTTGCCAAGCGTTTTAGCGCAAGAGTCCGTCACTCCATACATTGCAATGCTGAATGGAGA  
GCCGATTGGGTATGCCAGTCGTACGTTGCTCTTGGAAGCGGGACGGACGGTGGGAAGAAGAAACCGATC  
CAGGAGTACGCGGAATAGACCAGTTACTGGCGAATGCATCACAACCTGGGCAAAGGCTTGGGAACCAAGCTG  
GTTTCGAGCTCTGGTTGAGTTGCTGTTCAATGATCCCGAGGTCACCAAGATCCAAACGGACCCGTCGCCGAGCA  
ACTTGCGAGCGATCCGATGCTACGAGAAAGCGGGGTTTGAGAGGCAAGGTACCGTAACCACCCCATATGGTC  
CAGCCGTGTACATGGTTCAAACACGCCAGGCATTTCGAGCGAACACGCAGTGATGCCTAACCCCTTCATCGAGG  
GGGACGTCCAAGGGCTGGCGCCCTTGCCGCCCCCTCATGTCAAACGTTGGGCGAACCCGGAGCCTCATTAAAT  
GTTAGCCGTTAAAATTAAGCCCTTTACCAAACCAATACTTATTATGAAAAACACAATACATATCAACTTCGCTAT  
TTTTTAATAATTGCAAATATTATCTACAGCAGCGCCAGTGCATCAACAGATATCTCTACTGTTGCATCTCCATT  
ATTTGAAGGAACTGAAGGTTGTTTTTACTTTACGATGCATCCACAAACGCTGAAATTGCTCAATTCAATAAAG  
CAAAGTGTGCAACGCAAATGGCACCAGATTCAACTTTCAAGATCGCATTATCACTTATGGCATTGATGCGGA  
AATAATAGATCAGAAAACCATATTCAAATGGGATAAAACCCCAAAGGAATGGAGATCTGGAACAGCAATCA  
TACACCAAAGACGTGGATGCAATTTTCTGTTGTTGGGTTTCGCAAGAAATAACCCAAAAAATTGGATTAAT  
AAAATCAAGAATTATCTCAAAGATTTTGATTATGGAAATCAAGACTTCTCTGGAGATAAAGAAAGAAACAACG  
GATTAACAGAAGCATGGCTCGAAAGTAGCTTAAAAATTCACCAGAAGAACAATTCAATTCCTGCGTAAAAAT  
TATTAATCACAATCTCCAGTTAAAACTCAGCCATAGAAAACCCATAGAGAACATGTATCTACAAGATCTGG  
ATAATAGTACAAAACGTATGGGAAAACCTGGTGCAGGATTCACAGCAAATAGAACCTTACAAAACGGATGGT  
TTGAAGGTTTATTATAAGCAAATCAGGACATAAATATGTTTTTGTGTCCGCACTTACAGGAACTTGGGGTC  
GAATTTAACATCAAGCATAAAAGCCAAGAAAAATGCGATCACCATTCTAAACACACTAAATTTATAAAAAATCT  
AATGGCAAATCGCCAACCCCTCAATCAAGTCGGGACGGCCAAAAGCAAGCTTTTGGCTCCCCTCGCTGGCG  
CTCGGCGCCCCTTATTTCAAACGTTAGACGGCAAAGTCACAGACCGCGGGATCTCTTATGACCAACTACTTTGA  
TAGCCCCTTCAAAGGCAAGCTGCTTTCTGAGCAAGTGAAGAACCCCAATATCAAAGTTGGGCGGTACAGCTAT  
TACTCTGGCTACTATCATGGGCACTCATTGATGACTGCGCACGGTATCTGTTTCCGGACCGTGATGACGTTGA  
TAAGTTGATCATCGGTAGTTTCTGCTCTATCGGGAGTGGGGCTTCCTTTATCATGGCTGGCAATCAGGGGCAT  
CGGTACGACTGGGCATCATCTTCCCGTTCTTTTATATGCAGGAAGAACCTGCATTCTCAAGCGCACTCGATGC

CTTCAAAAAGCAGGTAATACTGTCATTGGCAATGACGTTTGGATCGGCTCTGAGGCAATGGTCATGCCCGGA  
ATCAAGATCGGGCACGGTGCGGTGATAGGCAGCCGCTCGTTGGTGACAAAAGATGTGGGGCACTGTTGCAA  
AGTTAGCGATGAGGCAGCCTTTTGTCTTATTCAAAGGCCTTACATTTCAAAAACCTGCTTACCAGGCGCATT  
CGCCAGGGGATCACCATAATAAAATGCTGAGGCCTGGCCTTTCGCGTAGTGACGCATCACCTCAATACCTTT  
GATGGTGGCGTAAGCCGTCTTCATGGATTTAAATCCCAGCGTGGCGCCGATTATCCGTTTCAGTTTGCCATGAT  
CGCATTCAATCACGTTGTTCCGGTACTTAATCTGTCGGTGTTCAACGTCAGACGGGCACCGGCCTTCGCGTTTG  
AGCAGAGCAAGCGCGGACCATAGGCGGGCGCTTTATCCGTGTTGATGAATCGCGGGATCTGCCACTTCTTCA  
CGTTGTTGAGGATTTTACCCAGAAACCGGTATGCAGCTTTGCTGTTACGACGGGAGGAGAGATAAAAATCGA  
CAGTGCGGCCCCGGCTGTCGACGGCCCCGGTACAGATACGCCAGCGGCCATTGACCTTCACGTAGGTTTCATC  
CATGTGCCACGGGCAAAGATCGGAAGGGTTACGCCAGTACCAGCGCAGCCGTTTTTCCATTTAGGCGCATAA  
CGCTGAACCCAGCGGTAAATCGTGGAGTGATCGACATTCACTCCGCGTTCAGCCAGCATCTCCTGCAGCTCAC  
GGTAACTGATGCCGATTTTGCAGTACCAGCGTACGGCCACAGAATGATGTCACGCTGAAAATGCCGGCCTTT  
GAATGGGTTTCATGTGCAGCTCCATCAGCAAAAAGGGGATGATAAGTTTATCACCACCGACTATTTGCAACAGTG  
CCTCTCGATAGGTATAGTGTGTTTGCAGTTTAGAGGAGATATCGCGATGCATACGCGGAAGGCAATAACGGAG  
GCAATTCGAAAATTAGGAGTCAAACCGGTGACCTGTTGATGGTGCATGCCTCACTTAAAGCGATTGGTCCGG  
TCGAAGGAGGAGCGGAGACGGTCGTTGCCGCTTACGCTCCGCGTTGGGCCGACTGGCACTGTGATGGGA  
TACGCGTCGTGGGACCGATCACCTACGAGGAGACTCTGAATGGCGCTCGGTTGGATGACAAAGCCCCGCGT  
ACCTGGCCGCGTTCGATCCCGAACGGCCGGGACTTACCGTGGGTTTCGGCCTGCTGAATCAATTTCTGGTTC  
AAGCCCCGCGCGCGGCGCAGCGCGCACCCCGATGCATCGATGGTCGCGGTTGGTCCGCTAGCTGAAACGC  
TGACGGAGCCTCACGAACTCGGTCACGCCTTGGGGGAAGGGTCGCCCCTCGAGCGGTTGTCGCGCTTGGCG  
GGAAGGCCCTGCTGTTGGGTGCGCCGCTAAACTCCGTTACCGCATTGCACTACGCCGAGGCGGTTGCGGATA  
TCCCCAACAAACGATGGGTGACGTATGAGATGCCGATGCTTGAAGAAACGGTGAAGTCGCTGGAAAACG  
GCATCAGAATACGATTCAAACGGCATTCTCGATTGCTTTGCTATCGAAGGAAAGCCGGATGCGGTGCGAACTA  
TAGCAAATGCTTACGTGAAGCTCGGTGCGCATCGAGAAGGTGTCGTGGGCTTTGCTCAGTGCTACCTGTTGCA  
CGCGCAGGACATCGTGACGTTCCGGCTCACCTATCTTGAGAAGCACTTCGGAGCCACTCCGATCGTGCCAGCA  
CACGAAGCCGCCAGCGCTCTTGCAGCCTTCCGGTTAGAGGCCGTCGACAATGATAATCTGGATCAACGGA

CCTTTCGGCGCCGAAAGACGACTCTCGCTGAGCGGCTGCGCGATCGGCGTCCGAAATCGCTGATCTTTGACC  
CTGAGGAAATCGGGTTCGTGGTGAAAGAAACGGTCCCCATACCAGCGAGCGGAGACTATCAGGATCTCCCCT  
TGTGGAGGGGACTTACGATCGCTGCGGTCAGCGAGATTCGCAGGAATTACTIONCGCAGGACATCATCATCCAA  
TGACGCTCGTGACCCCGACTATCTGACTGAGATACTCGACGGGTTAAGGCAGATCGACGATCAGCTGCTGC  
ACATCTTTCTGATGCTTAACGAGGACCTATTGCGTCACCGGATCTCGAACCAGACCATGCATCCTGACCCGAAT  
CGGAATGCGGAGATTCGAGAGTGGCGATTAGCGAATGTCGCCCCGATGCTTGGCCGCAAGGGAACGGCTTCC  
GTCCACAACCCGTGTTCTCGATAGTGGTGCACACACCAGCGATGAACTTGCAGCGATGGTGTCTGCACAGACTC  
GATCAGCGCACCTGATCGCCTTAGAGCTGGCTCGGGAATCTGCACAGCGGGGATAAGTGGAGTTTCTGCCT  
GACTTCGGCTTAGATGCCGGGAACAGGAGAGACCATGACGAGACGACCGCGCCGGAACCATAGCCCGGCTTT  
CAAGGCGAAGGTGGCACTTGCCGCCATCCGAGGTGAGCAGACGCTGGTGGAGTTGTCCCAGCAGTTCGATGT  
GCACGCCAACAGATCAAGCAATGGAAAGACCAGCTCCTTGAGGGGGCGACAGGTGTGTTCCGGCGATGAAA  
CGAAAGCGGAGCCGTCCGGTCCGACCATCGATGTCAAACGCTGCACGCGAAAATCGGCGAACTGACACTG  
GAGAACGATTTTTTATCCGGTGCCTCGGCAAGGCGGGATTGCTGGGCGGAAAGAAATGATCGACCGCGAG  
CACAAGCTATCCGTCTGCGCCAGGCGAAGCTTCTCGGCTTCAGCCGTGGCAGCGTCTACTATCTGCCTCGTC  
CGGTGTCTGACGGCGATCTGGCCCTTATGCGCCGATTGACGAATTGCATCTCGACTACCCCTTGCCGGAAG  
TCGGATGTTGCAAGGGCTCTTGAGAGGAGAAGGTCTGGAGACCGGGCGGCGACACGTGCCACGCTGATGA  
AGAAGATGGGCATCAAGGCGATCTACCGCCGCCGAACACCTCGAAACCAGCGCCAGGGCACATACGAAAGC  
TGGCAGTACCCGGCCCAATCAGGTGTGGGCAATGGACCTGACCTACATCCCCATGGCGCGGGGATTTGTCTA  
TCTGTGCGCCGTCGTGGACTGGTTCAGCCGGAAGGTCTTGTGATGGCGGTTGTCGATCACGATGGAAGCAGC  
CTTCTGCATCGAGGCGGTGGAGGAGGCACTTGCCCGTCATGGCAGGCCGAAATCTTCAATACCGACCAGGG  
ATCGCAGTTCACCTCCATCGACTTCACCGCCGTGCTGAAGAGGTACAGATTGCCATCTCGATGGATGGCAAG  
GGTGCCTGGCGAGACAATGTCTTCGTGCGAGCGGCTCTGGCGTTCGATCAAATACGAGGAAGTCTACCTCCAT  
GCCTACAAGACTGTGTCCGAGGCACGCGTGGCATCGCCCGATATCTGAACTTCTACAACACCAGACGCCCCAC  
ATTGGCACTGTTGCAAAGTTAGCGATGAGGCAGCCTTTTGTCTTATTCAAAGGCCTTACATTTCAAAAACCTCTG  
CTTACCAGGCGCATTTTCGCCAGGGGATCACCATAATAAAATGCTGAGGCCTGGCCTTTGCGTAGTGCACGCA  
TCACCTCAATACCTTTGATGGTGGCGTAAGCCGTCTTCATGGATTTAAATCCCAGCGTGGCGCCGATTATCCGT

TTCAGTTTGCCATGATCGCATTCAATCACGTTGTTCCGGTACTTAATCTGTGCGGTGTTCAACGTCAGACGGGCA  
CCGGCCTTCGCGTTTGAGCAGAGCAAGCGCGGACCATAGGCGGGCGCTTTATCCGTGTTGATGAATCGCGG  
GATCTGCCACTTCTTCACGTTGTTGAGGATTTTACCCAGAAACCGGTATGCAGCTTTGCTGTTACGACGGGAG  
GAGAGATAAAAATCGACAGTGCGGCCCGGCTGTCGACGGCCCGGTACAGATACGCCAGCGGCCATTGACC  
TTCACGTAGGTTTCATCCATGTGCCACGGGCAAAGATCGGAAGGGTTACGCCAGTACCAGCGCAGCCGTTTTT  
CCATTTAGGGCGCATAACGCTGAACCCAGCGGTAAATCGTGGAGTGATCGACATTCCTCCGCGTTACGCCAG  
CATCTCCTGCAGCTCACGGTAACTGATGCCGTAATTTGCAGTACCAGCGTACGGCCACAGAATGATGTCACGC  
TGAAAATGCCGGCCTTTGAATGGGTTTCATGTGCAGCTCCATCAGCAAAGGGGATGATAAGTTTATCACCACC  
GACTATTTGCAACAGTGCCCAAATGGTGGTCACCATCCTGTCGGCTGTGGCACAGGCTGAACGCCGGAGGAT  
CCTAGAACGCACGAATGAGGGCCGACAGGAAGCAAAGCTGAAAGGAATCAAATTTGGCCGAGGGCGTACCG  
TGGACAGGAACGTCGTGCTGACGCTTCATCAGAAGGGCACTGGTGCAACGGAATTGCTCATCAGCTCAGTA  
TTGCCCGCTCCACGGTTTATAAAATCTTGAAGACGAAAGGGCCTCGTGATACGCCTATTTTTATAGGTTAATG  
TCATGATAATAATGGTTTCTTAGACGTCAGGTGGCACTTTTCGGGGAAATGTGCGCGGAACCCCTATTTGTTTA  
TTTTTCTAAATACATTCAAATATGTATCCGCTCATGAGACAATAACCCTGGTAAATGCTTCAATAATATTGAAAA  
AGGAAGAGTATGAGTATTCAACATTTTCGTGTCGCCCTTATTCCCTTTTTTGCGGCATTTTGCCTTCTGTTTTTG  
CTCACCCAGAAACGCTGGTGAAGTAAAAGATGCTGAAGATCAGTTGGGTGCACGAGTGGGTTACATCGAAC  
TGGATCTCAACAGCGGTAAGATCCTTGAGAGTTTTCGCCCCGAAGAACGTTTTCCAATGATGAGCACTTTTAAA  
GTTCTGCTATGTGGTGCGGTATTATCCCGTGTGACGCCGGCAAGAGCAACTCGGTGCGCCATACACTATT  
CTCAGAATGACTTGGTTGAGTACTCACCAGTCACAGAAAAGCATCTTACGGATGGCATGACAGTAAGAGAATT  
ATGCAGTGCTGCCATAACCATGAGTGATAAACTGCTGCCAACTTACTTCTGACAACGATCGGAGGACCGAAG  
GAGCTAACCGCTTTTTTGACAACATGGGGGATCATGTAACCTCGCCTTGATCGTTGGGAACCGGAGCTGAATG  
AAGCCATACCAAACGACGAGCGTGACACCACGATGCCTGCAGCAATGGCAACAACGTTGCGCAAATATTAA  
CTGGCGAACTACTTACTCTAGCTTCCCGGCAACAATTAATAGACTGGATGGAGGCGGATAAAGTTGCAGGACC  
ACTTCTGCGCTCGGCCCTTCCGGCTGGCTGGTTATTGCTGATAAATCTGGAGCCGGTGAGCGTGGGTCTCGC  
GGTATCATTGCAGCACTGGGGCCAGATGGTAAGCCCTCCCGTATCGTAGTTATCTACACGACGGGGAGTCAG  
GCAACTATGGATGAACGAAATAGACAGATCGCTGAGATAGGTGCCTCACTGATTAAGCATTGGTAACTGTCA

GACCAAGTTTACTCATATATACTTTAGATTGATTTAAACTTCATTTTTAATTTAAAAGGATCTAGGTGAAGATC  
CTTTTTGATAATCTCATGACCAAATCCCTTAACGTGAGTTTTCGTTCCACTGAGCGTCAGACCCCGTTTCACAC  
TGGTCACGCCCTCACCGACCTCAACCACCACCCCGGCACCTTCATGGCCGAGCACCACCGGGAACAGACCTTC  
CGGATCATCACCGGAAAGCGTGTAGGCATCGGTATGGCATAACCCGGTGTGACTGATTTTCACCAGCACTTCA  
CCTTTCTTCGGCGGTGCCACATCAATTTCAACAATTTCAAGGGGTAAACCCGGCCCGAAGGCGACTGCTGCGC  
GTGATTTCATAACGGTTCCTCTGTGTCTGAGGCTTATCATGGCAGGCGATAAGCACGAATGCCGTCCACCATA  
CCGCACAACAGCGCTGCCTGTATAGCGCCGGTCAGCAGGTGGCCGCCACCGGTGCCGTTTTTCTGATCAGCA  
GACAGATTGCCAGCAGCAGACCGTACAGTGCCGTGCCAATCAGCCACACCGTACCGTCCGCACTCTGCTGTGT  
CTGACTGAAAATAAAAGCAAACAGCAGCGGGCCCGCCACGCCGGTCAGATTGGTCAGGCTGACCAGCACACC  
CTGTAGTTTTCCCTGATTTGCCGCCGATGCCCCGGCAGAGATAATGCCCTGCAATGCAGGCAGTGAATTCCG  
CCGCCTGCCAGCAGGATCAGGACCGGATACACCATCCATCCGGAAGTGATAGCAGACATCAGTAAAAACGCG  
GTGGCATCGGCAATAAATCCGGCGAAAATAATGGTTTTCTCACTCAGCCGTTTTGCCAGCGCCCCGGCAACCA  
CCGCCTGAAACAGTGCATGCATCGCCCCGAGTCCC GCCAGTGAAAAACCGACCGCCGCGCTGTCCCAGGCAA  
AGCGGCTCTCCGTAAACAATACCCAGACAGTGGCCGGGATCTGCCCGATAAGCTGCGCGGTAAAAAGACAAA  
CAGCAACAGCGCCAGAGGTTTAAGCAGTGTGATAAAGCTGATACCTGCGCTTTCTTGTTTTCTGCTCCGCCGGT  
TTTTCTTCTGTCTGTACCGCCGTTTTAAAGATAAAAAGACCATCAGAAAGGTGCAGGCATTAGTATTGCCGCA  
ATGACAAACGGCAGATGCGGTGAGATATCCCCGCCAGTCCGCCGATAGCCGGCCCGGCAATCAGCCCCGCA  
CCAAAGGCCGCACCGAGACGGCCGAACCAGGCGGTACGCTCGCTGACCGCCGTGCTGTCCGCCACTACCGAA  
GCCGCAACCGCGCCGGTGGCACCAGTGATCCCGGAGATAATCCGCCCGAGATACAACATCCACAGCACATTG  
GACAGTGCCAGCAGTGTGTAATCAAACGCGGCACCCGCCAGGATAACAGCAGCACCAGTCTGCGCCCCAGC  
TTATCTGACCATCTGCCAGCAGCGGAGCAAAAACAGACCTGCATCACCGCATAACAGCGCCAGCAGAATGCCGT  
AATGGTTTGCCACATCCGCTTCCGGGAGATATTCCCGCAGCAGTGACGGTAATACCGGCATGATCAGACCAAT  
TCCCATCGCGTCCAGCAGTGTAAATCACCAGCGCGATGACAGCGGGTTTATTCATTTTTTCAGATCCTGTGTTAAT  
TCCCTATCATTGATAGAGTTGGAATATATCCCTATCAATGATAGAGTGTCAATCTGAAAATCGGAGGAGACGG  
TCATGGCACGGCTGAACAGAGAATCGGTTATTGATGCGGCACTGGAAGTCTGAAATGAGACAGGGATTGACG  
GGCTGACGACCCGCAAGCTGGCGCAGAAGCTGGGAATAGAACAGCCGACACTTTACTGGCATGTGAAAAATA



AACGGGCGTTACTGGATGCGCTGGCGGTGGAGATCCTGGCGCGTCATCATGATTATCACTGCCTGCGGCGG  
GGGAATCCTGGCAGTCATTTCTGCGCAATAATGCAATGAGTTTCCGCCGGGCGCTGCTGCGTTACCGTGACGG  
GGCAAAAGTGCACCTCGGCACCCGCCCTGATGAAAAACAGTATGATACGGTGGAACCCAGTTACGCTTTAT  
GACAGAAAACGGCTTTTCACTGCGCGACGGGTTATATGCGATTTAGCGGGTCAGTCATTTTACCCTTGGTGCC  
GTAAGGAGCAGCAGGAGCATACTGCCGCCCTGACCGACCGCCCTGCAGCACCGGACGAAAACCTGCCGCCG  
CTATTGCGGGAAGCGCTGCAGATTATGGACAGTGATGATGGTGAGCAGGCCTTTCTGCATGGCCTGGAGAGC  
CTGATCCGGGGGTTTGAGGTGCAGCTTACGGCACTGTTGCAAATAGTCGGTGGTGATAAACTTATCATCCCCT  
TTTGCTGATGGAGCTGCACATGAACCCATTCAAAGGCCGGCATTTCAGCGTGACATCATTCTGTGGGCCGTA  
CGCTGGTACTGCAAATACGGCATCAGTTACCGTGAGCTGCAGGAGATGCTGGCTGAACGCGGAGTGAATGTC  
GATCACTCCACGATTTACCGCTGGGTTTCAGCGTTATGCGCCTGAAATGGAAAACGGCTGCGCTGGTACTGGC  
GTAACCCCTCCGATCTTTGCCCGTGGCACATGGATGAAACCTACGTGAAGGTCAATGGCCGCTGGGCGTATCT  
GTACCGGGCCGTCGACAGCCGGGGCCGCACTGTGATTTTTATCTCTCCTCCCGTCGTAACAGCAAAGCTGCA  
TACCGTTTTCTGGGTAAAATCCTCAACAACGTGAAGAAGTGGCAGATCCCGCGATTTCATCAACACGGATAAAG  
CGCCCGCCTATGGTCGCGCGCTTGCTCTGCTCAAACGCGAAGGCCGGTGCCCGTCTGACGTTGAACACCGACA  
GATTAAGTACCGGAACAACGTGATTGAATGCGATCATGGCAAACCTGAAACGGATAATCGGCGCCACGCTGGG  
ATTTAAATCCATGAAGACGGCTTACGCCACCATCAAAGGTATTGAGGTGATGCGTGCACTACGCAAAGGCCA  
GGCCTCAGCATTTTATTATGGTGATCCCCTGGGCGAAATGCGCCTGGTAAGCAGAGTTTTTGAATGTAAGGC  
CTTTGAATAAGACAAAAGGCTGCCTCATCGCTAACTTTGCAACAGTGCCGGTACCCCATCGATGGGGGATCCT  
CTAGAGTCGACCCCTCGAGGGGCATGCAAGCTTGGCGTAATCATGGTCATAGCTGTTTCTGTGTGAAATTGT  
TATCCGCTCACAATTCACACAACATACGAGCCGGAAGCATAAAGTGTAAGCCTGGGGTGCCTAATGAGTG  
AGCTAACTCACATTAATTGCGTTGCGCTCACTGCCCGCTTCCAGTCGGGAAACCTGTCGTGCCAGCTGCATTA  
ATGAATCGGCCAACGCGCGGGGAGAGGCGGTTTGCATTGAGCTTGGCACTGGGCCAAGCTGAATTTCTGC  
CATTATCCGCTTATTATCACTTATTCAGGCGTAGCAACCAGGCGTTTAAGGGCACCAATAACTGCCTTAAAAA  
ATTACGCCCCGCCCTGCCACTCATCGCAGTACTGTTGTAATTCATTAAGCATTCTGCCGACATGGAAGCCATCA  
CAAACGGCATGATGAACCTGAATCGCCAGCGGCATCAGCACCTTGTCGCCTTGCGTATAATATTTGCCCATGG  
TGAAAACGGGGGCGAAGAAGTTGTCCATATTGGCCACGTTTAAATCAAACCTGGTGAAACTCACCCAGGGAT

TGGCTGAGACGAAAAACATATTCTCAATAAACCCCTTAGGGAAATAGGCCAGGTTTTACCGTAACACGCCAC  
ATCTTGCGAATATATGTGTAGAACTGCCGAAATCGTCGTGGTATTCACTCCAGAGCGATGAAAACGTTTCA  
GTTTGCTCATGGAAAACGGTGTAAACAAGGGTGAACACTATCCCATATCACCAGCTCACCGTCTTTCATTGCCAT  
ACGAAATTCCGGATGAGCATTATCAGGCGGGCAAGAATGTGAATAAAGGCCGGATAAAAACCTTGTGCTTATT  
TTTCTTACGGTCTTAAAAAGGCCGTAATATCCAGCTGAACGGTCTGGTTATAGGTACATTGAGCAACTGACT  
GAAATGCCTCAAATGTTCTTACGATGCCATTGGGATATATCAACGGTGGTATATCCAGTGATTTTTTTCTCCA  
TTTTAGCTTCCTTAGCTCCTGAAAATCTCGATAACTCAAAAAATACGCCCGGTAGTGATCTTATTCATTATGGT  
GAAAGTTGGAACCTTACGTGCCGATCAACGTCTCATTTTCGCCAAAAGTTGGCCCAGGGCTTCCCGGTATCA  
ACAGGGACACCAGGATTTATTTATTCTGCGAAGTGATCTCCGTTGACGGAGTCCACTGAGCGTCAGACCC  
CGTAGAAAAGATCAAAGGATCTTCTTGAGATCCTTTTTCTGCGCGTAATCTGCTGCTTGCAAACAAAAAAC  
ACCGCTACCAGCGGTGGTTTGTGGCCGGATCAAGAGCTACCAACTCTTTTTCCGAAGGTAAGTGGCTTCAGCA  
GAGCGCAGATACCAAATACTGTTCTTCTAGTGTAGCCGTAGTTAGGCCACCACTTCAAGAACTCTGTAGCACC  
GCCTACATACCTCGCTCTGCTAATCCTGTTACCAGTGGCTGCTGCCAGTGGCGATAAGTCGTGTCTTACCGGGT  
TGGAICTAAGACGATAGTTACCGGATAAGGCGCAGCGGTGGGGCTGAACGGGGGGTTCGTGCACACAGCCC  
AGCTTGGAGCGAACGACCTACACCGAACTGAGATACCTACAGCGTGAGCTATGAGAAAGCGCCACGCTTCCC  
GAAGGGAGAAAGGCGGACAGGTATCCGGTAAGCGGCAGGGTCGGAACAGGAGAGCGCACGAGGGAGCTTC  
CAGGGGGAAACGCCTGGTATCTTTATAGTCCTGTGCGGGTTTCGCCACCTCTGACTTGAGCGTCGATTTTTGTGA  
TGCTCGTCAGGGGGCGGAGCCTATGGAAAACGCCAGCAACGCGGCCTTTTTACGGTTCCTGGCCTTTTGCTG  
GCCTTTTGCTCACATGTTCTTCTGCGTTATCCCCTGATTCTGTGGATAACCGTATTACCGCCTTTGAGTGAGC  
TGATACCGCTCGCCGAGCCGAACGACCGAGCGCAGCGAGTCAGTGAGCGAGGAAGCGGAAGAAGCTCATT  
CGCCATTCAGGCTGCGCAACTGTTGGGAAGGGCGATCGGTGCGGGCCTCTTCGCTATTACGCCAGCTGGCGA  
AAGGGGGATGTGCTGCAAGGCGATTAAGTTGGGTAACGCCAGGGTTTTCCAGTCACGACGTTGTA AACGA  
CGGCCAGTGAATTC

**Supplementary Figure 6: Sequence of pHSG396:IS26 with the translocatable unit (TU) and tandem array of TUs in the chromosome. Consensus sequence of A) pHSG396:IS26 plasmid, B) pHSG396:IS26 plus translocatable unit (TU) and C) tandem pHSG396:IS26 plus TU**

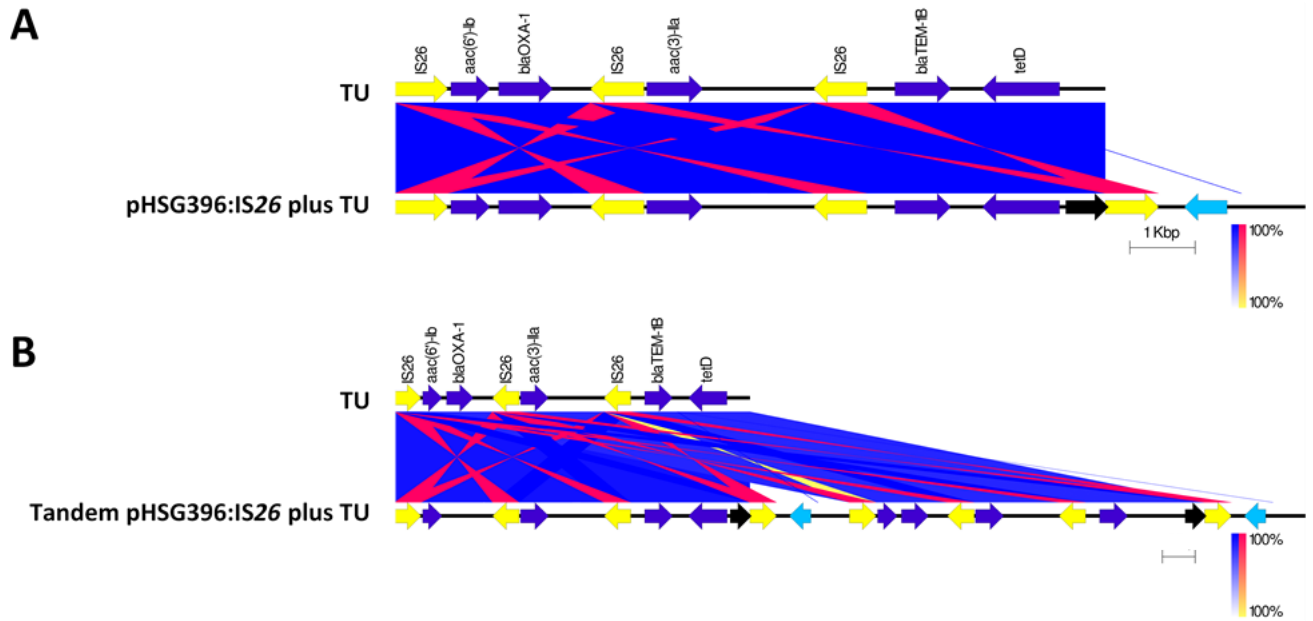

**Supplementary Figure 7: The translocatable unit inserted adjacent to IS26 in pHSG396:IS26**

**following replication of the evolutionary event.** Comparison of the nucleotide sequence of the translocatable unit (TU) to the consensus sequence of the predicted plasmid structures of **A)** pHSG396:IS26 plus TU and **B)** tandem pHSG396:IS26 plus TU. Yellow arrows represent IS26, blue arrows represent antimicrobial resistance genes, black arrows represent *tetR* and light blue arrows represents the chloramphenicol resistance gene of pHSG396. Percentage relatedness between the predicted and consensus sequences in the same orientation are represented in by the blue to white scale and percentage relatedness between the predicted and consensus sequences in the opposite direction are represented in the by the pink to yellow scale. Scale equals 1000 base pairs.
